# Supplementary material for: Biomechanical limits of hopping in the hindlimbs of giant extinct kangaroos
Source: Research Square preprint supplement (doi:10.21203/rs.3.rs-5825571/v1), 2025-01-29
Supplement: Supplementary file 1 [file 3a7338af29308ccc330b231a.xlsx]

## Sheet: Data
Species	Specimen no	Status	Family	Subgroup	Locomotion	Mass_source	Lengths_source	Mass	Femur	Tibia	Metatarsal	Mt4_AP_midshaft_width	Mt4_ML_midshaft_width	Proximal_phalanx	Calcaneum_length_mm	Calcaneum_width_mm	Calcaneum midshaft ML width	Calcaneum midshaft DV width	Data_type	Fig. 2	Fig. 3	Fig. 4	Fig. S1	Fig. S2	Fig. S3	Fig. S4	Table S2
Aepyprymnus_rufescens	AMNH_65283	Extant	Potoroidae	Potoroinae	Hopper	SD	CJ	3	94.12	126.19	52.26	4.68	6.27	27.92	18.33	NA	NA	NA	Adult	1	1	0	0	1	1	1	1
Aepyprymnus_rufescens	QM_J5579	Extant	Potoroidae	Potoroinae	Hopper	SD	CJ	3	96.65	130.48	56.21	5.33	6.92	27.94	22.22	NA	NA	NA	Adult	1	1	0	0	1	1	1	1
Aepyprymnus_rufescens	SAM_M9017	Extant	Potoroidae	Potoroinae	Hopper	SD	CJIJ	3	102.29	139.44	63.33	NA	NA	27.51	NA	NA	NA	NA	Adult	0	0	0	0	1	1	0	1
Aepyprymnus_rufescens	Unknown	Extant	Potoroidae	Potoroinae	Hopper	Th	Th_McG	2.27	105.54	129.64	53.51	NA	NA	NA	NA	NA	NA	NA	Adult	0	0	0	0	0	1	0	1
Aepyprymnus_rufescens	Unknown	Extant	Potoroidae	Potoroinae	Hopper	SD	Th_K	3	104.9	113.15	55.2	NA	NA	NA	NA	NA	NA	NA	Adult	0	0	0	0	0	1	0	1
Aepyprymnus_rufescens	Unknown	Extant	Potoroidae	Potoroinae	Hopper	SD	Th_K	3	104.7	129.25	55.05	NA	NA	NA	NA	NA	NA	NA	Adult	0	0	0	0	0	1	0	1
Aepyprymnus_rufescens	Unknown	Extant	Potoroidae	Potoroinae	Hopper	SD	Th_K	3	95.4	114.5	49.8	NA	NA	NA	NA	NA	NA	NA	Adult	0	0	0	0	0	1	0	1
Aepyprymnus_rufescens	Unknown	Extant	Potoroidae	Potoroinae	Hopper	SD	Th_K	3	101	128.5	52.4	NA	NA	NA	NA	NA	NA	NA	Adult	0	0	0	0	0	1	0	1
Aepyprymnus_rufescens	Unknown	Extant	Potoroidae	Potoroinae	Hopper	SD	Th_K	3	105.8	130.6	56.3	NA	NA	NA	NA	NA	NA	NA	Adult	0	0	0	0	0	1	0	1
Aepyprymnus_rufescens	Unknown	Extant	Potoroidae	Potoroinae	Hopper	SD	Th_K	3	97	130	55.7	NA	NA	NA	NA	NA	NA	NA	Adult	0	0	0	0	0	1	0	1
Aepyprymnus_rufescens	Unknown	Extant	Potoroidae	Potoroinae	Hopper	SD	Th_K	3	100.4	130	54.2	NA	NA	NA	NA	NA	NA	NA	Adult	0	0	0	0	0	1	0	1
Aepyprymnus_rufescens	Unknown	Extant	Potoroidae	Potoroinae	Hopper	SD	Th_K	3	68.5	93.8	46.5	NA	NA	NA	NA	NA	NA	NA	Adult	0	0	0	0	0	1	0	1
Aepyprymnus_rufescens	Unknown	Extant	Potoroidae	Potoroinae	Hopper	SD	Th_K	3	94	120	55.5	NA	NA	NA	NA	NA	NA	NA	Adult	0	0	0	0	0	1	0	1
Aepyprymnus_rufescens	Unknown	Extant	Potoroidae	Potoroinae	Hopper	SD	Th_K	3	62.55	68.5	21.8	NA	NA	NA	NA	NA	NA	NA	Adult	0	0	0	0	0	1	0	1
Bettongia_gaimardi	Unknown	Extant	Potoroidae	Potoroinae	Hopper	Th	Th_D	1.67	84.4	99.5	46.4	NA	NA	NA	NA	NA	NA	NA	Adult	0	0	0	0	0	1	0	1
Bettongia_lesueur	AM_M2132	Extant	Potoroidae	Potoroinae	Hopper	SD	CJ	1.1	78.81	108.95	43.46	4.9	5.52	19.41	16.9	NA	NA	NA	Adult	1	1	0	0	1	1	1	1
Bettongia_lesueur	SAM_M2135	Extant	Potoroidae	Potoroinae	Hopper	SD	CJ	1.1	75.09	NA	42.51	4.86	5.34	21.42	20.16	NA	NA	NA	Adult	1	1	0	0	0	1	1	1
Bettongia_lesueur	Unknown	Extant	Potoroidae	Potoroinae	Hopper	Th	Th_D	1.45	56.8	75.6	38.9	NA	NA	NA	NA	NA	NA	NA	Adult	0	0	0	0	0	1	0	1
Bettongia_lesueur	Unknown	Extant	Potoroidae	Potoroinae	Hopper	SD	Th_J	1.1	89	111	NA	NA	NA	NA	NA	NA	NA	NA	Adult	0	0	0	0	0	1	0	1
Bettongia_lesueur	Unknown	Extant	Potoroidae	Potoroinae	Hopper	Th	Th_McG	1.36	77.54	98.57	48.66	NA	NA	42.64	NA	NA	NA	NA	Adult	0	0	0	0	1	1	0	1
Bettongia_lesueur	Unknown	Extant	Potoroidae	Potoroinae	Hopper	SD	Th_K	1.1	81.25	103.05	42.7	NA	NA	NA	NA	NA	NA	NA	Adult	0	0	0	0	0	1	0	1
Bettongia_lesueur	Unknown	Extant	Potoroidae	Potoroinae	Hopper	SD	Th_K	1.1	84.8	113.35	46.45	NA	NA	NA	NA	NA	NA	NA	Adult	0	0	0	0	0	1	0	1
Bettongia_lesueur	Unknown	Extant	Potoroidae	Potoroinae	Hopper	SD	Th_K	1.1	83.8	105.75	42.75	NA	NA	NA	NA	NA	NA	NA	Adult	0	0	0	0	0	1	0	1
Bettongia_lesueur	Unknown	Extant	Potoroidae	Potoroinae	Hopper	SD	Th_K	1.1	85.15	113.65	43.65	NA	NA	NA	NA	NA	NA	NA	Adult	0	0	0	0	0	1	0	1
Bettongia_lesueur	Unknown	Extant	Potoroidae	Potoroinae	Hopper	SD	Th_K	1.1	84.95	109	42.75	NA	NA	NA	NA	NA	NA	NA	Adult	0	0	0	0	0	1	0	1
Bettongia_lesueur	Unknown	Extant	Potoroidae	Potoroinae	Hopper	SD	Th_K	1.1	83.1	105.55	43.2	NA	NA	NA	NA	NA	NA	NA	Adult	0	0	0	0	0	1	0	1
Bettongia_lesueur	Unknown	Extant	Potoroidae	Potoroinae	Hopper	SD	Th_K	1.1	91.3	114.7	44.55	NA	NA	NA	NA	NA	NA	NA	Adult	0	0	0	0	0	1	0	1
Bettongia_lesueur	Unknown	Extant	Potoroidae	Potoroinae	Hopper	SD	Th_K	1.1	74.7	101.2	40.5	NA	NA	NA	NA	NA	NA	NA	Adult	0	0	0	0	0	1	0	1
Bettongia_penicillata	FMNH_129431	Extant	Potoroidae	Potoroinae	Hopper	SD	RB	1.3	72.7	99.85	44.69	NA	NA	19.65	NA	NA	NA	NA	Adult	0	0	0	0	1	1	0	1
Bettongia_penicillata	SAM_M18986	Extant	Potoroidae	Potoroinae	Hopper	SD	CJIJ	1.3	72.99	99.96	42.87	NA	NA	20.39	NA	NA	NA	NA	Adult	0	0	0	0	1	1	0	1
Bettongia_penicillata	SAM_M18986	Extant	Potoroidae	Potoroinae	Hopper	SD	CJ	1.3	72.58	99.63	42.37	4.57	4.26	19.55	15.68	NA	NA	NA	Adult	1	1	0	0	1	1	1	1
Bettongia_penicillata	Unknown	Extant	Potoroidae	Potoroinae	Hopper	Th	Th_D	1.18	80.1	104.4	44.4	NA	NA	NA	NA	NA	NA	NA	Adult	0	0	0	0	0	1	0	1
Bettongia_penicillata	Unknown	Extant	Potoroidae	Potoroinae	Hopper	SD	Th_K	1.3	86	106.35	47.75	NA	NA	NA	NA	NA	NA	NA	Adult	0	0	0	0	0	1	0	1
Bettongia_penicillata	Unknown	Extant	Potoroidae	Potoroinae	Hopper	SD	Th_K	1.3	78.25	100.9	43	NA	NA	NA	NA	NA	NA	NA	Adult	0	0	0	0	0	1	0	1
Bettongia_penicillata	Unknown	Extant	Potoroidae	Potoroinae	Hopper	SD	Th_K	1.3	81.35	100.7	44.6	NA	NA	NA	NA	NA	NA	NA	Adult	0	0	0	0	0	1	0	1
Bettongia_penicillata	Unknown	Extant	Potoroidae	Potoroinae	Hopper	SD	Th_K	1.3	81	107.1	50.25	NA	NA	NA	NA	NA	NA	NA	Adult	0	0	0	0	0	1	0	1
Bettongia_penicillata	Unknown	Extant	Potoroidae	Potoroinae	Hopper	SD	Th_K	1.3	77.1	98.55	39.65	NA	NA	NA	NA	NA	NA	NA	Adult	0	0	0	0	0	1	0	1
Bettongia_penicillata	Unknown	Extant	Potoroidae	Potoroinae	Hopper	SD	Th_K	1.3	90.1	112	48.2	NA	NA	NA	NA	NA	NA	NA	Adult	0	0	0	0	0	1	0	1
Bettongia_penicillata	Unknown	Extant	Potoroidae	Potoroinae	Hopper	SD	Th_K	1.3	80	103.35	43.5	NA	NA	NA	NA	NA	NA	NA	Adult	0	0	0	0	0	1	0	1
Bettongia_tropica	AM_M40067	Extant	Potoroidae	Potoroinae	Hopper	SD	CJ	1.6	80.31	106.89	48.43	5.38	5.31	23.1	16.73	NA	NA	NA	Adult	1	1	0	0	1	1	1	1
Caloprymnus_campestris	NTM_48050	Extinct	Potoroidae	Potoroinae	Hopper	SD	CJ	0.8	87.39	108.17	48.63	4.41	5	25.29	17.86	NA	NA	NA	Adult	1	1	0	0	1	1	1	1
Dendrolagus_bennettianus	WAM_M5530	Extant	Macropodidae	Tree_kangaroo	Quadrupedal	SD	CJ	13	143.66	155.1	52.63	6.66	10.02	24.26	33.93	NA	NA	NA	Adult	1	1	0	0	1	1	1	1
Dendrolagus_bennettianus	Unknown	Extant	Macropodidae	Tree_kangaroo	Quadrupedal	SD	Th_Jo	13	146	148	NA	NA	NA	NA	NA	NA	NA	NA	Adult	0	0	0	0	0	1	0	1
Dendrolagus_bennettianus	Unknown	Extant	Macropodidae	Tree_kangaroo	Quadrupedal	SD	Th_K	13	154.2	156.1	52.5	NA	NA	NA	NA	NA	NA	NA	Adult	0	0	0	0	0	1	0	1
Dendrolagus_dorianus	AM_M9109	Extant	Macropodidae	Tree_kangaroo	Quadrupedal	SD	CJ	8.8	124.75	120.73	37.12	5.58	7.21	14.92	25.5	NA	NA	NA	Adult	1	1	0	0	1	1	1	1
Dendrolagus_dorianus	Unknown	Extant	Macropodidae	Tree_kangaroo	Quadrupedal	SD	Th_Ja	8.8	120.49	NA	NA	NA	NA	NA	NA	NA	NA	NA	Adult	0	0	0	0	0	1	0	1
Dendrolagus_goodfellowi	NMV_C.25092	Extant	Macropodidae	Tree_kangaroo	Quadrupedal	SD	CJ	6.7	122.54	121.24	36.26	5.09	7.2	15	25.5	NA	NA	NA	Adult	1	1	0	0	1	1	1	1
Dendrolagus_goodfellowi	Unknown	Extant	Macropodidae	Tree_kangaroo	Quadrupedal	SD	Th_K	6.7	134.6	150.9	41.1	NA	NA	NA	NA	NA	NA	NA	Adult	0	0	0	0	0	1	0	1
Dendrolagus_lumholtzi	AMNH_65265	Extant	Macropodidae	Tree_kangaroo	Quadrupedal	SD	CJ	5.9	124.23	127.64	41.72	4.89	8.17	19.34	31.05	NA	NA	NA	Adult	1	1	0	0	1	1	1	1
Dendrolagus_lumholtzi	SAM_M7206	Extant	Macropodidae	Tree_kangaroo	Quadrupedal	SD	CJ	7.4	126.16	138.22	42.33	5.17	8.12	21.65	27.3	NA	NA	NA	Adult	1	1	0	0	1	1	1	1
Dendrolagus_matschiei	QM_J5287	Extant	Macropodidae	Tree_kangaroo	Quadrupedal	ADW	CJ	9.5	137.9	145.19	47.6	6.45	9.05	24.4	33.14	NA	NA	NA	Adult	1	1	0	0	1	1	1	1
Dendrolagus_matschiei	WAM_M21013	Extant	Macropodidae	Tree_kangaroo	Quadrupedal	ADW	CJ	9.5	128.53	133.86	36.24	5.25	7.45	15.59	24.01	NA	NA	NA	Adult	1	1	0	0	1	1	1	1
Dendrolagus_matschiei	Unknown	Extant	Macropodidae	Tree_kangaroo	Quadrupedal	ADW	Th_K	9.5	133.3	135.5	36.5	NA	NA	NA	NA	NA	NA	NA	Adult	0	0	0	0	0	1	0	1
Dendrolagus_scottae	Unknown	Extant	Macropodidae	Tree_kangaroo	Quadrupedal	ADW	Th_Ja	10	140.91	136.72	40.47	NA	NA	NA	NA	NA	NA	NA	Adult	0	0	0	0	0	1	0	1
Dorcopsis_atrata	AM_M19461	Extant	Macropodidae	Macropodinae	Hopper	ADW	CJ	2.3	134.69	166.1	47.51	6.22	7.63	18.4	28	NA	NA	NA	Adult	1	1	0	0	1	1	1	1
Dorcopsis_atrata	Unknown	Extant	Macropodidae	Macropodinae	Hopper	ADW	Th_K	2.3	155.6	170.8	46	NA	NA	NA	NA	NA	NA	NA	Adult	0	0	0	0	0	1	0	1
Dorcopsis_luctuosa	SAM_M15178	Extant	Macropodidae	Macropodinae	Hopper	ADW	CJIJ	3.6	126.29	164.87	47.15	5.58	7.21	19.38	27.8	12.24	NA	NA	Adult	1	0	1	0	1	1	0	1
Dorcopsis_luctuosa	Unknown	Extant	Macropodidae	Macropodinae	Hopper	ADW	Th_Ja	3.6	121.25	159.56	47.22	NA	NA	42.08	NA	NA	NA	NA	Adult	0	0	0	0	1	1	0	1
Dorcopsis_luctuosa	Unknown	Extant	Macropodidae	Macropodinae	Hopper	SD	Th_K	5	145.8	166.2	48.8	NA	NA	NA	NA	NA	NA	NA	Adult	0	0	0	0	0	1	0	1
Dorcopsis_muelleri	AM_M32341	Extant	Macropodidae	Macropodinae	Hopper	SD	CJ	9	162.89	226.21	61.14	8.78	8.9	23.57	35.78	NA	NA	NA	Adult	1	1	0	0	1	1	1	1
Dorcopsis_muelleri	AMNH_22262	Extant	Macropodidae	Macropodinae	Hopper	SD	CJ	5	133.87	189.7	31.72	6.83	6.47	21.39	26.41	NA	NA	NA	Adult	1	1	0	0	1	1	1	1
Dorcopsis_muelleri	NHMUK_1933.11.4.4	Extant	Macropodidae	Macropodinae	Hopper	SD	CJIJ	5	117.24	175.82	59.59	4.89	8.17	23.92	NA	NA	NA	NA	Adult	1	0	0	0	1	1	0	1
Dorcopsis_muelleri	Unknown	Extant	Macropodidae	Macropodinae	Hopper	SD	Th_Ja	5	130.54	NA	NA	NA	NA	NA	NA	NA	NA	NA	Adult	0	0	0	0	0	1	0	1
Dorcopsoides_sp	NTM_P890	Extinct	Macropodidae	Macropodinae	Unknown	CJ	CJ	11	153.29	NA	73.91	NA	NA	31.74	38.46	NA	NA	NA	Adult	0	1	0	0	0	1	1	1
Ganawamaya_gillespieae	QM_F34532	Extinct	Balbaridae	Balbaridae	Unknown	B	CJ	6	133.85	189.7	48.7	9.27	8	20.5	30.35	NA	NA	NA	Adult	1	1	0	0	1	1	1	1
Ganawamaya_gillespieae	Unknown	Extinct	Balbaridae	Balbaridae	Unknown	B	Th_K	6	144	164	91.1	NA	NA	NA	NA	NA	NA	NA	Adult	0	0	0	0	0	1	0	1
Hadronomas_puckridgei	NTM_borrowed_material	Extinct	Sthenurinae	Sthenurinae	Unknown	Wa	CJ	72.8	NA	NA	150.86	15.98	19.96	52.31	71.14	NA	NA	NA	Adult	1	1	0	0	0	1	1	1
Hadronomas_puckridgei	NTM_Composite	Extinct	Sthenurinae	Sthenurinae	Unknown	Wa	CJ	72.8	271.91	493	157.82	18.04	20.45	53.11	70.86	NA	NA	NA	Adult	1	1	0	0	1	1	1	1
Hypsiprymnodon_moschatus	SAM_M11940	Extant	Hypsiprymnodontidae	Hypsiprymnodontidae	Bounder	SD	CJIJ	0.5	61.53	71.23	23.16	NA	NA	10.7	11.08	3.32	NA	NA	Adult	0	0	1	0	1	1	0	1
Hypsiprymnodon_moschatus	Unknown	Extant	Hypsiprymnodontidae	Hypsiprymnodontidae	Quadrupedal	SD	Th_Ja	0.5	60.59	67.21	21.68	NA	NA	22.15	NA	NA	NA	NA	Adult	0	0	0	0	1	1	0	1
Hypsiprymnodon_moschatus	Unknown	Extant	Hypsiprymnodontidae	Hypsiprymnodontidae	Quadrupedal	Th	Th_Jo	0.545	NA	NA	38.6	NA	NA	21.4	NA	NA	NA	NA	Adult	0	0	0	0	0	1	0	1
Hypsiprymnodon_moschatus	Unknown	Extant	Hypsiprymnodontidae	Hypsiprymnodontidae	Quadrupedal	Th	Th_Jo	0.54	NA	NA	36.1	NA	NA	23.9	NA	NA	NA	NA	Adult	0	0	0	0	0	1	0	1
Hypsiprymnodon_moschatus	Unknown	Extant	Hypsiprymnodontidae	Hypsiprymnodontidae	Quadrupedal	SD	Th_Jo	0.5	NA	NA	NA	NA	NA	20.6	NA	NA	NA	NA	Adult	0	0	0	0	0	1	0	1
Hypsiprymnodon_moschatus	Unknown	Extant	Hypsiprymnodontidae	Hypsiprymnodontidae	Quadrupedal	SD	Th_Jo	0.5	NA	NA	NA	NA	NA	22	NA	NA	NA	NA	Adult	0	0	0	0	0	1	0	1
Hypsiprymnodon_moschatus	Unknown	Extant	Hypsiprymnodontidae	Hypsiprymnodontidae	Quadrupedal	SD	Th_Jo	0.5	NA	NA	NA	NA	NA	22.6	NA	NA	NA	NA	Adult	0	0	0	0	0	1	0	1
Hypsiprymnodon_moschatus	Unknown	Extant	Hypsiprymnodontidae	Hypsiprymnodontidae	Quadrupedal	SD	Th_Jo	0.5	NA	NA	30.4	NA	NA	21.6	NA	NA	NA	NA	Adult	0	0	0	0	0	1	0	1
Hypsiprymnodon_moschatus	Unknown	Extant	Hypsiprymnodontidae	Hypsiprymnodontidae	Quadrupedal	SD	Th_Jo	0.5	NA	NA	NA	NA	NA	21.8	NA	NA	NA	NA	Adult	0	0	0	0	0	1	0	1
Hypsiprymnodon_moschatus	Unknown	Extant	Hypsiprymnodontidae	Hypsiprymnodontidae	Quadrupedal	Th	Th_Jo	0.337	NA	NA	36.5	NA	NA	21.5	NA	NA	NA	NA	Adult	0	0	0	0	0	1	0	1
Hypsiprymnodon_moschatus	Unknown	Extant	Hypsiprymnodontidae	Hypsiprymnodontidae	Quadrupedal	SD	Th_Jo	0.5	58	65	NA	NA	NA	NA	NA	NA	NA	NA	Adult	0	0	0	0	0	1	0	1
Hypsiprymnodon_moschatus	Unknown	Extant	Hypsiprymnodontidae	Hypsiprymnodontidae	Quadrupedal	SD	Th_K	0.5	62.55	68.5	21.8	NA	NA	NA	NA	NA	NA	NA	Adult	0	0	0	0	0	1	0	1
Hypsiprymnodon_moschatus	Unknown	Extant	Hypsiprymnodontidae	Hypsiprymnodontidae	Quadrupedal	SD	Th_K	0.5	58	65	22	NA	NA	NA	NA	NA	NA	NA	Adult	0	0	0	0	0	1	0	1
Lagorchestes_conspicillatus	AMNH_197659	Extant	Macropodidae	Macropodinae	Hopper	SD	CJ	3.1	104.11	153.15	64.58	5.68	6.58	21.84	23.66	NA	NA	NA	Adult	1	1	0	0	1	1	1	1
Lagorchestes_conspicillatus	WAM_M7032	Extant	Macropodidae	Macropodinae	Hopper	SD	CJ	3.1	104.76	145.09	61.8	4.48	5.39	20.17	22.02	NA	NA	NA	Adult	1	1	0	0	1	1	1	1
Lagorchestes_conspicillatus	WAM_M7632	Extant	Macropodidae	Macropodinae	Hopper	SD	CJIJ	3.1	104.98	146.83	61.12	6.45	9.05	19.87	NA	NA	NA	NA	Adult	1	0	0	0	1	1	0	1
Lagorchestes_hirsutus	AM_M40031	Extant	Macropodidae	Macropodinae	Hopper	SD	CJ	1.7	80.08	118.52	42.64	4.63	5.22	19.57	18.47	NA	NA	NA	Adult	1	1	0	0	1	1	1	1
Lagorchestes_hirsutus	SAM_M3587	Extant	Macropodidae	Macropodinae	Hopper	SD	CJ	1.7	91.32	127.93	53.27	4.27	4.2	18.88	17.92	NA	NA	NA	Adult	1	1	0	0	1	1	1	1
Lagorchestes_hirsutus	SAM_M3590	Extant	Macropodidae	Macropodinae	Hopper	SD	CJIJ	1.7	81.24	128.23	47.74	6.22	7.63	16.36	NA	NA	NA	NA	Adult	1	0	0	0	1	1	0	1
Lagorchestes_hirsutus	Unknown	Extant	Macropodidae	Macropodinae	Hopper	SD	Th_K	1.7	90.5	122.9	50.8	NA	NA	NA	NA	NA	NA	NA	Adult	0	0	0	0	0	1	0	1
Lagorchestes_hirsutus	Unknown	Extant	Macropodidae	Macropodinae	Hopper	SD	Th_K	1.7	98.1	131.75	53.1	NA	NA	NA	NA	NA	NA	NA	Adult	0	0	0	0	0	1	0	1
Lagorchestes_hirsutus	Unknown	Extant	Macropodidae	Macropodinae	Hopper	SD	Th_K	1.7	85.85	121	51.4	NA	NA	NA	NA	NA	NA	NA	Adult	0	0	0	0	0	1	0	1
Lagostrophus_fasciatus	AM_M40303	Extant	Lagostrophinae	Lagostrophinae	Hopper	SD	CJ	1.7	86.38	116.9	42.24	4.49	4.95	19.8	20.07	NA	NA	NA	Adult	1	1	0	0	1	1	1	1
Lagostrophus_fasciatus	WAM_M4393	Extant	Lagostrophinae	Lagostrophinae	Hopper	SD	CJIJ	1.7	80.83	109.37	43.01	NA	NA	19.24	NA	NA	NA	NA	Adult	0	0	0	0	1	1	0	1
Lagostrophus_fasciatus	WAM_M6791	Extant	Lagostrophinae	Lagostrophinae	Hopper	SD	CJIJ	1.7	87.19	119.33	46.15	NA	NA	18.32	NA	NA	NA	NA	Adult	0	0	0	0	1	1	0	1
Lagostrophus_fasciatus	WAM_M16285	Extant	Lagostrophinae	Lagostrophinae	Hopper	SD	CJ	1.7	85.14	117.13	44.36	4.5	5.23	20.1	18.48	NA	NA	NA	Adult	1	1	0	0	1	1	1	1
Lagostrophus_fasciatus	WAM_M22911	Extant	Lagostrophinae	Lagostrophinae	Hopper	SD	CJ	1.7	85.45	118.34	48.89	4.91	5.32	NA	19.48	NA	NA	NA	Adult	1	1	0	0	0	1	1	1
Lagostrophus_fasciatus	WAM_M4393	Extant	Lagostrophinae	Lagostrophinae	Hopper	SD	CJ	1.7	80.48	107.84	44.81	4.24	5.03	19.26	17.97	NA	NA	NA	Adult	1	1	0	0	1	1	1	1
Macropus_ferragus	NMV_P25290	Extinct	Macropodidae	Macropus_complex	Unknown	D	CJ	150	NA	646	198.74	23.28	24.02	51.96	93.45	NA	NA	NA	Adult	1	1	0	0	0	1	1	1
Macropus_ferragus	UCMP_53578	Extinct	Macropodidae	Macropus_complex	Unknown	D	CJ	150	NA	NA	206.7	NA	NA	49.2	NA	NA	NA	NA	Adult	0	0	0	0	0	1	0	1
Macropus_fuliginosus	SAM_M16578	Extant	Macropodidae	Macropus_complex	Hopper	SD	CJ	38	211.9	480	148.99	14.52	13.81	40.15	63.07	NA	NA	NA	Adult	1	1	0	0	1	1	1	1
Macropus_fuliginosus	SAM_M21497	Extant	Macropodidae	Macropus_complex	Hopper	SD	CJ	70	246.91	545	175.16	16.88	17.61	45.62	75.04	NA	NA	NA	Adult	1	1	0	0	1	1	1	1
Macropus_fuliginosus	Unknown	Extant	Macropodidae	Macropus_complex	Hopper	Th	Th_D	25.56	189.3	290.4	101.4	NA	NA	NA	NA	NA	NA	NA	Adult	0	0	0	0	0	1	0	1
Macropus_fuliginosus	Unknown	Extant	Macropodidae	Macropus_complex	Hopper	Th	Th_McG	79.63	290.67	547.33	173.33	NA	NA	NA	NA	NA	NA	NA	Adult	0	0	0	0	0	1	0	1
Macropus_giganteus	AMNH_35186	Extant	Macropodidae	Macropus_complex	Hopper	GB	CJ	43	212.05	401.2	144.56	13.96	17.14	45.09	63.57	NA	NA	NA	Adult	1	1	0	0	1	1	1	1
Macropus_giganteus	AMNH_35747	Extant	Macropodidae	Macropus_complex	Hopper	GB	CJ	43	254.44	517	164.16	14.6	19.62	46.58	74.25	NA	NA	NA	Adult	1	1	0	0	1	1	1	1
Macropus_giganteus	NMV_C5532	Extant	Macropodidae	Macropus_complex	Hopper	SD	CJ	28	209	410	154.03	14.76	15.39	47.53	64.17	NA	NA	NA	Adult	1	1	0	0	1	1	1	1
Macropus_giganteus	QM_J11525	Extant	Macropodidae	Macropus_complex	Hopper	GB	CJ	43	252.71	530	169.37	16.77	19	48.9	78.42	NA	NA	NA	Adult	1	1	0	0	1	1	1	1
Macropus_giganteus	SAM_composite_(parts_fit_together)	Extant	Macropodidae	Macropus_complex	Hopper	GB	CJ	43	NA	NA	171.35	17.96	20.19	45.88	76.9	NA	NA	NA	Adult	1	1	0	0	0	1	1	1
Macropus_giganteus	NA	Extant	Macropodidae	Macropus_complex	Hopper	SD	Th_B	37.8	190	355	NA	NA	NA	NA	NA	NA	NA	NA	Adult	0	0	0	0	0	1	0	1
Macropus_giganteus	AMNH_2390	Extant	Macropodidae	Macropus_complex	Hopper	SD	CJ	37.8	NA	NA	180.5	17.45	16.46	42.24	NA	NA	NA	NA	Adult	1	0	0	0	0	1	0	1
Macropus_giganteus	Unknown	Extant	Macropodidae	Macropus_complex	Hopper	Th	Th_D	60	267.5	473.9	166.3	NA	NA	NA	NA	NA	NA	NA	Adult	0	0	0	0	0	1	0	1
Macropus_giganteus	Unknown	Extant	Macropodidae	Macropus_complex	Hopper	Th	Th_D	60	299.7	543.2	183.8	NA	NA	NA	NA	NA	NA	NA	Adult	0	0	0	0	0	1	0	1
Macropus_giganteus	Unknown	Extant	Macropodidae	Macropus_complex	Hopper	Th	Th_McG	23.45	226.81	409.64	155.8	NA	NA	85.47	NA	NA	NA	NA	Adult	0	0	0	0	1	1	0	1
Macropus_giganteus	Unknown	Extant	Macropodidae	Macropus_complex	Hopper	SD	Th_K	37.8	219	391.45	146.95	NA	NA	NA	NA	NA	NA	NA	Adult	0	0	0	0	0	1	0	1
Macropus_giganteus	Unknown	Extant	Macropodidae	Macropus_complex	Hopper	SD	Th_K	37.8	219.05	382.2	142	NA	NA	NA	NA	NA	NA	NA	Adult	0	0	0	0	0	1	0	1
Macropus_giganteus	Unknown	Extant	Macropodidae	Macropus_complex	Hopper	SD	Th_K	37.8	178.2	249.5	85.8	NA	NA	NA	NA	NA	NA	NA	Adult	0	0	0	0	0	1	0	1
Macropus_giganteus	Unknown	Extant	Macropodidae	Macropus_complex	Hopper	SD	Th_K	37.8	249.9	423.8	154.1	NA	NA	NA	NA	NA	NA	NA	Adult	0	0	0	0	0	1	0	1
Macropus_giganteus	Unknown	Extant	Macropodidae	Macropus_complex	Hopper	SD	Th_K	37.8	272	490.45	172.3	NA	NA	NA	NA	NA	NA	NA	Adult	0	0	0	0	0	1	0	1
Macropus_giganteus	Unknown	Extant	Macropodidae	Macropus_complex	Hopper	SD	Th_K	37.8	292.4	513.4	167.1	NA	NA	NA	NA	NA	NA	NA	Adult	0	0	0	0	0	1	0	1
Macropus_giganteus	Unknown	Extant	Macropodidae	Macropus_complex	Hopper	SD	Th_K	37.8	268.55	493	160.9	NA	NA	NA	NA	NA	NA	NA	Adult	0	0	0	0	0	1	0	1
Macropus_titan	AMNH_18362	Extinct	Macropodidae	Macropus_complex	Unknown	CJ	CJ	160	320	NA	188.34	28.46	24.96	57.63	96.88	NA	NA	NA	Adult	1	1	0	0	0	1	1	1
Macropus_titan	NHMUK_composite	Extinct	Macropodidae	Macropus_complex	Unknown	CJ	CJ	160	NA	NA	213.78	25.64	27.13	62.57	109.73	NA	NA	NA	Adult	1	1	0	0	0	1	1	1
Macropus_titan	NMV_Lancefield_composite	Extinct	Macropodidae	Macropus_complex	Unknown	CJ	CJ	160	NA	NA	207	24.73	24.63	64.22	99.42	NA	NA	NA	Adult	1	1	0	0	0	1	1	1
Macropus_unknown	Unknown	Extant	Macropodidae	Macropus_complex	Hopper	Th	Th_McG	19.2	NA	290.67	NA	NA	NA	NA	NA	NA	NA	NA	Adult	0	0	0	0	0	1	0	1
Macropus_unknown	Unknown	Extant	Macropodidae	Macropus_complex	Hopper	Th	Th_McG	16.07	NA	295.42	NA	NA	NA	NA	NA	NA	NA	NA	Adult	0	0	0	0	0	1	0	1
Macropus_unknown	Unknown	Extant	Macropodidae	Macropus_complex	Hopper	Th	Th_McG	15.39	NA	326.39	NA	NA	NA	NA	NA	NA	NA	NA	Adult	0	0	0	0	0	1	0	1
Macropus_unknown	Unknown	Extant	Macropodidae	Macropus_complex	Hopper	Th	Th_McG	15.07	191.95	NA	136.2	NA	NA	84.29	NA	NA	NA	NA	Adult	0	0	0	0	0	1	0	1
Macropus_unknown	Unknown	Extant	Macropodidae	Macropus_complex	Hopper	Th	Th_McG	13.67	NA	NA	118.24	NA	NA	85.67	NA	NA	NA	NA	Adult	0	0	0	0	0	1	0	1
Macropus_unknown	Unknown	Extant	Macropodidae	Macropus_complex	Hopper	Th	Th_McG	13.45	NA	296.11	NA	NA	NA	NA	NA	NA	NA	NA	Adult	0	0	0	0	0	1	0	1
Macropus_unknown	Unknown	Extant	Macropodidae	Macropus_complex	Hopper	Th	Th_McG	11.73	183.25	NA	99.83	NA	NA	87.27	NA	NA	NA	NA	Adult	0	0	0	0	0	1	0	1
Macropus_unknown	Unknown	Extant	Macropodidae	Macropus_complex	Hopper	Th	Th_McG	11.02	NA	253.51	NA	NA	NA	NA	NA	NA	NA	NA	Adult	0	0	0	0	0	1	0	1
Macropus_unknown	Unknown	Extant	Macropodidae	Macropus_complex	Hopper	Th	Th_McG	10.45	157.98	227.87	NA	NA	NA	NA	NA	NA	NA	NA	Adult	0	0	0	0	0	1	0	1
Macropus_unknown	Unknown	Extant	Macropodidae	Macropus_complex	Hopper	Th	Th_McG	10.39	NA	NA	101.94	NA	NA	73.68	NA	NA	NA	NA	Adult	0	0	0	0	0	1	0	1
Macropus_unknown	Unknown	Extant	Macropodidae	Macropus_complex	Hopper	Th	Th_McG	6.62	119.62	187.55	73.17	NA	NA	56.44	NA	NA	NA	NA	Adult	0	0	0	0	1	1	0	1
Macropus_unknown	Unknown	Extant	Macropodidae	Macropus_complex	Hopper	Th	Th_McG	6.31	134.63	218.56	NA	NA	NA	NA	NA	NA	NA	NA	Adult	0	0	0	0	0	1	0	1
Macropus_unknown	Unknown	Extant	Macropodidae	Macropus_complex	Hopper	Th	Th_McG	5.16	142.33	212.07	NA	NA	NA	59.95	NA	NA	NA	NA	Adult	0	0	0	0	0	1	0	1
Macropus_unknown	Unknown	Extant	Macropodidae	Macropus_complex	Hopper	Th	Th_McG	5.1	NA	NA	84.68	NA	NA	NA	NA	NA	NA	NA	Adult	0	0	0	0	0	1	0	1
Macropus_unknown	Unknown	Extant	Macropodidae	Macropus_complex	Hopper	Th	Th_McG	4.65	135.57	174.14	65.62	NA	NA	NA	NA	NA	NA	NA	Adult	0	0	0	0	0	1	0	1
Macropus_unknown	Unknown	Extant	Macropodidae	Macropus_complex	Hopper	Th	Th_McG	4.56	NA	NA	NA	NA	NA	56.18	NA	NA	NA	NA	Adult	0	0	0	0	0	1	0	1
Notamacropus_agilis	AMNH_35750	Extant	Macropodidae	Macropus_complex	Hopper	SD	CJ	11	162.22	247.59	97.37	10.77	10.02	28.01	37.08	NA	NA	NA	Adult	1	1	0	0	1	1	1	1
Notamacropus_agilis	Unknown	Extant	Macropodidae	Macropus_complex	Hopper	Th	Th_D	11.82	169.8	239.4	94.5	NA	NA	NA	NA	NA	NA	NA	Adult	0	0	0	0	0	1	0	1
Notamacropus_agilis	Unknown	Extant	Macropodidae	Macropus_complex	Hopper	Th	Th_McG	13.16	191.06	NA	NA	NA	NA	NA	NA	NA	NA	NA	Adult	0	0	0	0	0	1	0	1
Notamacropus_agilis	Unknown	Extant	Macropodidae	Macropus_complex	Hopper	SD	Th_K	11	144.05	179.35	NA	NA	NA	NA	NA	NA	NA	NA	Adult	0	0	0	0	0	1	0	1
Notamacropus_agilis	Unknown	Extant	Macropodidae	Macropus_complex	Hopper	SD	Th_K	11	154	192	NA	NA	NA	NA	NA	NA	NA	NA	Adult	0	0	0	0	0	1	0	1
Notamacropus_agilis	Unknown	Extant	Macropodidae	Macropus_complex	Hopper	SD	Th_K	11	172	246.15	97.75	NA	NA	NA	NA	NA	NA	NA	Adult	0	0	0	0	0	1	0	1
Notamacropus_dorsalis	NMV_6490	Extant	Macropodidae	Macropus_complex	Hopper	SD	CJIJ	16	131.06	211.75	89.96	NA	NA	25.3	NA	NA	NA	NA	Adult	0	0	0	0	1	1	0	1
Notamacropus_dorsalis	NMV_C6490	Extant	Macropodidae	Macropus_complex	Hopper	SD	CJ	16	134.89	201.98	77.75	7.23	8.59	22.35	34.77	NA	NA	NA	Adult	1	1	0	0	1	1	1	1
Notamacropus_dorsalis	Unknown	Extant	Macropodidae	Macropus_complex	Hopper	Th	Th_McG	6.26	NA	NA	86.47	NA	NA	49.34	NA	NA	NA	NA	Adult	0	0	0	0	0	1	0	1
Notamacropus_dorsalis	Unknown	Extant	Macropodidae	Macropus_complex	Hopper	Th	Th_McG	16	156.05	218.1	81.2	NA	NA	NA	NA	NA	NA	NA	Adult	0	0	0	0	0	1	0	1
Notamacropus_dorsalis	Unknown	Extant	Macropodidae	Macropus_complex	Hopper	Th	Th_McG	16	130.25	189.35	72.7	NA	NA	NA	NA	NA	NA	NA	Adult	0	0	0	0	0	1	0	1
Notamacropus_dorsalis	Unknown	Extant	Macropodidae	Macropus_complex	Hopper	Th	Th_McG	16	151.65	221.05	82.25	NA	NA	NA	NA	NA	NA	NA	Adult	0	0	0	0	0	1	0	1
Notamacropus_dorsalis	Unknown	Extant	Macropodidae	Macropus_complex	Hopper	Th	Th_McG	16	140.6	205.8	79.75	NA	NA	NA	NA	NA	NA	NA	Adult	0	0	0	0	0	1	0	1
Notamacropus_dorsalis	Unknown	Extant	Macropodidae	Macropus_complex	Hopper	Th	Th_McG	16	174.25	231.25	82.15	NA	NA	NA	NA	NA	NA	NA	Adult	0	0	0	0	0	1	0	1
Notamacropus_dorsalis	Unknown	Extant	Macropodidae	Macropus_complex	Hopper	Th	Th_McG	16	172	249	88.1	NA	NA	NA	NA	NA	NA	NA	Adult	0	0	0	0	0	1	0	1
Notamacropus_eugenii	NHMUK_1948.7.12.3	Extant	Macropodidae	Macropus_complex	Hopper	SD	CJIJ	6.55	100.91	171.53	60.44	NA	NA	26.57	NA	NA	NA	NA	Adult	0	0	0	0	1	1	0	1
Notamacropus_eugenii	NMV_C7908	Extant	Macropodidae	Macropus_complex	Hopper	SD	CJ	5.5	114.85	159.98	58.6	6.35	7.53	22.04	28.85	NA	NA	NA	Adult	1	1	0	0	1	1	1	1
Notamacropus_eugenii	Unknown	Extant	Macropodidae	Macropus_complex	Hopper	Th	Th_D	5.28	123.3	167.4	60.1	NA	NA	NA	NA	NA	NA	NA	Adult	0	0	0	0	0	1	0	1
Notamacropus_eugenii	Unknown	Extant	Macropodidae	Macropus_complex	Hopper	Th	Th_McG	6.74	124	187	74	NA	NA	63	NA	NA	NA	NA	Adult	0	0	0	0	1	1	0	1
Notamacropus_eugenii	Unknown	Extant	Macropodidae	Macropus_complex	Hopper	Th	Th_McG	5.77	113	178	76	NA	NA	53	NA	NA	NA	NA	Adult	0	0	0	0	1	1	0	1
Notamacropus_eugenii	Unknown	Extant	Macropodidae	Macropus_complex	Hopper	Th	Th_McG	6.76	120	191	66	NA	NA	59	NA	NA	NA	NA	Adult	0	0	0	0	1	1	0	1
Notamacropus_eugenii	Unknown	Extant	Macropodidae	Macropus_complex	Hopper	Th	Th_McG	7.15	119	191	68	NA	NA	57	NA	NA	NA	NA	Adult	0	0	0	0	1	1	0	1
Notamacropus_eugenii	Unknown	Extant	Macropodidae	Macropus_complex	Hopper	Th	Th_McG	6.78	122	189	75	NA	NA	50	NA	NA	NA	NA	Adult	0	0	0	0	1	1	0	1
Notamacropus_eugenii	Unknown	Extant	Macropodidae	Macropus_complex	Hopper	Th	Th_McG	7.4	129	191	107	NA	NA	72	NA	NA	NA	NA	Adult	0	0	0	0	1	1	0	1
Notamacropus_eugenii	Unknown	Extant	Macropodidae	Macropus_complex	Hopper	Th	Th_McG	6.64	114.63	176.65	71	NA	NA	56.03	NA	NA	NA	NA	Adult	0	0	0	0	1	1	0	1
Notamacropus_eugenii	Unknown	Extant	Macropodidae	Macropus_complex	Hopper	SD	Th_K	6	124.8	167.05	60.85	NA	NA	NA	NA	NA	NA	NA	Adult	0	0	0	0	0	1	0	1
Notamacropus_eugenii	Unknown	Extant	Macropodidae	Macropus_complex	Hopper	SD	Th_K	6	123.2	165.2	59.65	NA	NA	NA	NA	NA	NA	NA	Adult	0	0	0	0	0	1	0	1
Notamacropus_eugenii	Unknown	Extant	Macropodidae	Macropus_complex	Hopper	SD	Th_K	6	127.5	177.75	NA	NA	NA	NA	NA	NA	NA	NA	Adult	0	0	0	0	0	1	0	1
Notamacropus_eugenii	Unknown	Extant	Macropodidae	Macropus_complex	Hopper	SD	Th_K	6	130.25	181	60.45	NA	NA	NA	NA	NA	NA	NA	Adult	0	0	0	0	0	1	0	1
Notamacropus_eugenii	Unknown	Extant	Macropodidae	Macropus_complex	Hopper	SD	Th_K	6	133	180.5	60.1	NA	NA	NA	NA	NA	NA	NA	Adult	0	0	0	0	0	1	0	1
Notamacropus_eugenii	Unknown	Extant	Macropodidae	Macropus_complex	Hopper	SD	Th_K	6	143	199.8	62.5	NA	NA	NA	NA	NA	NA	NA	Adult	0	0	0	0	0	1	0	1
Notamacropus_eugenii	Unknown	Extant	Macropodidae	Macropus_complex	Hopper	SD	Th_K	6	126	174.6	60.5	NA	NA	NA	NA	NA	NA	NA	Adult	0	0	0	0	0	1	0	1
Notamacropus_eugenii	Unknown	Extant	Macropodidae	Macropus_complex	Hopper	SD	Th_K	6	122.7	180.2	61.75	NA	NA	NA	NA	NA	NA	NA	Adult	0	0	0	0	0	1	0	1
Notamacropus_eugenii	Unknown	Extant	Macropodidae	Macropus_complex	Hopper	SD	Th_K	6	117.35	161.05	58.95	NA	NA	NA	NA	NA	NA	NA	Adult	0	0	0	0	0	1	0	1
Notamacropus_irma	Unknown	Extant	Macropodidae	Macropus_complex	Hopper	ADW	Th_K	8	153.85	236.95	88.75	NA	NA	NA	NA	NA	NA	NA	Adult	0	0	0	0	0	1	0	1
Notamacropus_parma	SAM_M7192	Extant	Macropodidae	Macropus_complex	Hopper	SD	CJ	3.8	110.75	145.77	57.82	5.73	6.46	22.4	26.44	NA	NA	NA	Adult	1	1	0	0	1	1	1	1
Notamacropus_parma	Unknown	Extant	Macropodidae	Macropus_complex	Hopper	Th	Th_D	4.16	134.2	168.5	57.9	NA	NA	NA	NA	NA	NA	NA	Adult	0	0	0	0	0	1	0	1
Notamacropus_parma	Unknown	Extant	Macropodidae	Macropus_complex	Hopper	SD	Th_K	3.8	97.2	122.35	53.6	NA	NA	NA	NA	NA	NA	NA	Adult	0	0	0	0	0	1	0	1
Notamacropus_parma	Unknown	Extant	Macropodidae	Macropus_complex	Hopper	SD	Th_K	3.8	128.9	165.6	59.35	NA	NA	NA	NA	NA	NA	NA	Adult	0	0	0	0	0	1	0	1
Notamacropus_parma	Unknown	Extant	Macropodidae	Macropus_complex	Hopper	SD	Th_K	3.8	107.4	134.15	52.35	NA	NA	NA	NA	NA	NA	NA	Adult	0	0	0	0	0	1	0	1
Notamacropus_parma	Unknown	Extant	Macropodidae	Macropus_complex	Hopper	SD	Th_K	3.8	121.1	152.35	57.4	NA	NA	NA	NA	NA	NA	NA	Adult	0	0	0	0	0	1	0	1
Notamacropus_parma	Unknown	Extant	Macropodidae	Macropus_complex	Hopper	SD	Th_K	3.8	118.1	153	58.1	NA	NA	NA	NA	NA	NA	NA	Adult	0	0	0	0	0	1	0	1
Notamacropus_parma	Unknown	Extant	Macropodidae	Macropus_complex	Hopper	SD	Th_K	3.8	120.4	156.1	NA	NA	NA	NA	NA	NA	NA	NA	Adult	0	0	0	0	0	1	0	1
Notamacropus_parryi	AMNH_65054	Extant	Macropodidae	Macropus_complex	Hopper	SD	CJ	11	168.32	261.69	103.62	12.5	10.99	32.12	43.64	NA	NA	NA	Adult	1	1	0	0	1	1	1	1
Notamacropus_parryi	Unknown	Extant	Macropodidae	Macropus_complex	Hopper	Th	Th_McG	15.7	192.84	NA	104.57	NA	NA	NA	NA	NA	NA	NA	Adult	0	0	0	0	0	1	0	1
Notamacropus_parryi	Unknown	Extant	Macropodidae	Macropus_complex	Hopper	SD	Th_K	11	154.8	220	102	NA	NA	NA	NA	NA	NA	NA	Adult	0	0	0	0	0	1	0	1
Notamacropus_parryi	Unknown	Extant	Macropodidae	Macropus_complex	Hopper	SD	Th_K	11	135.4	195.8	94	NA	NA	NA	NA	NA	NA	NA	Adult	0	0	0	0	0	1	0	1
Notamacropus_parryi	Unknown	Extant	Macropodidae	Macropus_complex	Hopper	SD	Th_K	11	143.3	208	97	NA	NA	NA	NA	NA	NA	NA	Adult	0	0	0	0	0	1	0	1
Notamacropus_parryi	Unknown	Extant	Macropodidae	Macropus_complex	Hopper	SD	Th_K	11	217	333	119.7	NA	NA	NA	NA	NA	NA	NA	Adult	0	0	0	0	0	1	0	1
Notamacropus_parryi	Unknown	Extant	Macropodidae	Macropus_complex	Hopper	SD	Th_K	11	194.6	294	106.1	NA	NA	NA	NA	NA	NA	NA	Adult	0	0	0	0	0	1	0	1
Notamacropus_parryi	Unknown	Extant	Macropodidae	Macropus_complex	Hopper	SD	Th_K	11	176	248	107.2	NA	NA	NA	NA	NA	NA	NA	Adult	0	0	0	0	0	1	0	1
Notamacropus_rufogriseus	Unknown	Extant	Macropodidae	Macropus_complex	Hopper	ADW	Th_B	15	138	191	NA	NA	NA	NA	NA	NA	NA	NA	Adult	0	0	0	0	0	1	0	1
Notamacropus_rufogriseus	Unknown	Extant	Macropodidae	Macropus_complex	Hopper	Th	Th_D	16.85	199.3	285.1	98.6	NA	NA	NA	NA	NA	NA	NA	Adult	0	0	0	0	0	1	0	1
Notamacropus_rufogriseus	Unknown	Extant	Macropodidae	Macropus_complex	Hopper	ADW	Th_Ja	15	156.8	233.84	89.59	NA	NA	72.75	NA	NA	NA	NA	Adult	0	0	0	0	1	1	0	1
Notamacropus_rufogriseus	Unknown	Extant	Macropodidae	Macropus_complex	Hopper	ADW	Th_K	15	182.75	255.6	88.7	NA	NA	NA	NA	NA	NA	NA	Adult	0	0	0	0	0	1	0	1
Notamacropus_rufogriseus	Unknown	Extant	Macropodidae	Macropus_complex	Hopper	ADW	Th_K	15	176.5	261	101.5	NA	NA	NA	NA	NA	NA	NA	Adult	0	0	0	0	0	1	0	1
Notamacropus_rufogriseus	Unknown	Extant	Macropodidae	Macropus_complex	Hopper	ADW	Th_K	15	209.6	279	NA	NA	NA	NA	NA	NA	NA	NA	Adult	0	0	0	0	0	1	0	1
Notamacropus_rufogriseus	Unknown	Extant	Macropodidae	Macropus_complex	Hopper	ADW	Th_K	15	185.3	261.95	NA	NA	NA	NA	NA	NA	NA	NA	Adult	0	0	0	0	0	1	0	1
Notamacropus_rufogriseus	Unknown	Extant	Macropodidae	Macropus_complex	Hopper	ADW	Th_K	15	154.55	255.25	94.1	NA	NA	NA	NA	NA	NA	NA	Adult	0	0	0	0	0	1	0	1
Notamacropus_rufogriseus	Unknown	Extant	Macropodidae	Macropus_complex	Hopper	ADW	Th_K	15	191.2	288.5	108	NA	NA	NA	NA	NA	NA	NA	Adult	0	0	0	0	0	1	0	1
Notamacropus_rufogriseus	Unknown	Extant	Macropodidae	Macropus_complex	Hopper	ADW	Th_K	15	165	229.75	78.75	NA	NA	NA	NA	NA	NA	NA	Adult	0	0	0	0	0	1	0	1
Notamacropus_rufogriseus	Unknown	Extant	Macropodidae	Macropus_complex	Hopper	ADW	Th_K	15	171	235.8	NA	NA	NA	NA	NA	NA	NA	NA	Adult	0	0	0	0	0	1	0	1
Onychogalea_fraenata	SAM_M24347	Extant	Macropodidae	Macropodinae	Hopper	SD	CJ	5.5	128	NA	61.57	6.99	7.93	24.46	27	NA	NA	NA	Adult	1	1	0	0	0	1	1	1
Onychogalea_fraenata	NMV_C6400	Extant	Macropodidae	Macropodinae	Hopper	SD	CJ	4.5	113.4	172.4	59.91	6.83	6.98	25.42	27.06	NA	NA	NA	Adult	1	1	0	0	1	1	1	1
Onychogalea_fraenata	SAM_M24347	Extant	Macropodidae	Macropodinae	Hopper	SD	CJIJ	5	125.18	195.03	60.92	NA	NA	23.18	NA	NA	NA	NA	Adult	0	0	0	0	1	1	0	1
Onychogalea_fraenata	UMZC_a12._59/3	Extant	Macropodidae	Macropodinae	Hopper	SD	RB	5	106.21	155.55	62.25	NA	NA	23.11	NA	NA	NA	NA	Adult	0	0	0	0	1	1	0	1
Onychogalea_fraenata	Unknown	Extant	Macropodidae	Macropodinae	Hopper	Th	Th_D	4.95	119.5	185	56.3	NA	NA	NA	NA	NA	NA	NA	Adult	0	0	0	0	0	1	0	1
Onychogalea_fraenata	Unknown	Extant	Macropodidae	Macropodinae	Hopper	SD	Th_Ja	5	113.4	172.4	59.91	NA	NA	57.42	NA	NA	NA	NA	Adult	0	0	0	0	1	1	0	1
Onychogalea_fraenata	Unknown	Extant	Macropodidae	Macropodinae	Hopper	SD	Th_Ja	5	102.35	155.29	55.68	NA	NA	54.26	NA	NA	NA	NA	Adult	0	0	0	0	1	1	0	1
Onychogalea_fraenata	Unknown	Extant	Macropodidae	Macropodinae	Hopper	SD	Th_K	5	116.85	176.85	62.95	NA	NA	NA	NA	NA	NA	NA	Adult	0	0	0	0	0	1	0	1
Onychogalea_fraenata	Unknown	Extant	Macropodidae	Macropodinae	Hopper	SD	Th_K	5	125.55	180.2	61.3	NA	NA	NA	NA	NA	NA	NA	Adult	0	0	0	0	0	1	0	1
Onychogalea_fraenata	Unknown	Extant	Macropodidae	Macropodinae	Hopper	SD	Th_K	5	118.3	174.55	62.85	NA	NA	NA	NA	NA	NA	NA	Adult	0	0	0	0	0	1	0	1
Onychogalea_fraenata	Unknown	Extant	Macropodidae	Macropodinae	Hopper	SD	Th_K	5	123	169.8	65.7	NA	NA	NA	NA	NA	NA	NA	Adult	0	0	0	0	0	1	0	1
Onychogalea_fraenata	Unknown	Extant	Macropodidae	Macropodinae	Hopper	SD	Th_K	5	177.8	175.2	57	NA	NA	NA	NA	NA	NA	NA	Adult	0	0	0	0	0	1	0	1
Onychogalea_fraenata	Unknown	Extant	Macropodidae	Macropodinae	Hopper	SD	Th_K	5	117	180	54.2	NA	NA	NA	NA	NA	NA	NA	Adult	0	0	0	0	0	1	0	1
Onychogalea_fraenata	Unknown	Extant	Macropodidae	Macropodinae	Hopper	SD	Th_K	5	129	193.5	61.7	NA	NA	NA	NA	NA	NA	NA	Adult	0	0	0	0	0	1	0	1
Onychogalea_fraenata	Unknown	Extant	Macropodidae	Macropodinae	Hopper	SD	Th_K	5	114.2	161	57.5	NA	NA	NA	NA	NA	NA	NA	Adult	0	0	0	0	0	1	0	1
Onychogalea_fraenata	Unknown	Extant	Macropodidae	Macropodinae	Hopper	SD	Th_K	5	113.4	176	61.2	NA	NA	NA	NA	NA	NA	NA	Adult	0	0	0	0	0	1	0	1
Onychogalea_fraenata	Unknown	Extant	Macropodidae	Macropodinae	Hopper	SD	Th_K	5	112.15	177.45	64.05	NA	NA	NA	NA	NA	NA	NA	Adult	0	0	0	0	0	1	0	1
Onychogalea_unguifera	WAM_M11611	Extant	Macropodidae	Macropodinae	Hopper	SD	CJIJ	6.7	143.74	216.66	93.94	NA	NA	34.87	NA	NA	NA	NA	Adult	0	0	0	0	1	1	0	1
Onychogalea_unguifera	WAM_M11622	Extant	Macropodidae	Macropodinae	Hopper	SD	CJ	7.5	132.36	205.18	76.93	8.33	9.22	33.29	34.95	NA	NA	NA	Adult	1	1	0	0	1	1	1	1
Osphranter_antilopinus	AMNH_70449	Extant	Macropodidae	Macropus_complex	Hopper	SD	CJ	37	221.71	359.26	127.61	12.07	14.17	40.49	63.13	NA	NA	NA	Adult	1	1	0	0	1	1	1	1
Osphranter_antilopinus	Unknown	Extant	Macropodidae	Macropus_complex	Hopper	ADW	Th_Ja	42.5	221.71	359.26	127.61	NA	NA	98.87	NA	NA	NA	NA	Adult	0	0	0	0	1	1	0	1
Osphranter_robustus	AMNH_65036	Extant	Macropodidae	Macropus_complex	Hopper	SD	CJ	40	232.61	507	128.58	13.49	15.5	40.1	60.27	NA	NA	NA	Adult	1	1	0	0	1	1	1	1
Osphranter_robustus	SAM_3695	Extant	Macropodidae	Macropus_complex	Hopper	SD	CJIJ	40	252.91	431.47	166.74	NA	NA	42.1	NA	NA	NA	NA	Adult	0	0	0	0	1	1	0	1
Osphranter_robustus	SAM_M13977	Extant	Macropodidae	Macropus_complex	Hopper	SD	CJ	40	251.58	466	142.94	15.02	16.59	45.41	69.63	NA	NA	NA	Adult	1	1	0	0	1	1	1	1
Osphranter_robustus	SAM_M3695	Extant	Macropodidae	Macropus_complex	Hopper	SD	CJ	40	235.97	410	134.05	14.46	15.84	42.97	60.8	NA	NA	NA	Adult	1	1	0	0	1	1	1	1
Osphranter_robustus	Unknown	Extant	Macropodidae	Macropus_complex	Hopper	Th	Th_D	25.98	207.5	326.4	113.8	NA	NA	NA	NA	NA	NA	NA	Adult	0	0	0	0	0	1	0	1
Osphranter_robustus	Unknown	Extant	Macropodidae	Macropus_complex	Hopper	SD	Th_Jo	40	163	282	NA	NA	NA	NA	NA	NA	NA	NA	Adult	0	0	0	0	0	1	0	1
Osphranter_robustus	Unknown	Extant	Macropodidae	Macropus_complex	Hopper	Th	Th_McG	18.79	219.06	NA	NA	NA	NA	NA	NA	NA	NA	NA	Adult	0	0	0	0	0	1	0	1
Osphranter_robustus	Unknown	Extant	Macropodidae	Macropus_complex	Hopper	SD	Th_K	40	274	469.5	141.95	NA	NA	NA	NA	NA	NA	NA	Adult	0	0	0	0	0	1	0	1
Osphranter_robustus	Unknown	Extant	Macropodidae	Macropus_complex	Hopper	SD	Th_K	40	261	435	133.25	NA	NA	NA	NA	NA	NA	NA	Adult	0	0	0	0	0	1	0	1
Osphranter_robustus	Unknown	Extant	Macropodidae	Macropus_complex	Hopper	SD	Th_K	40	198.9	313	112.9	NA	NA	NA	NA	NA	NA	NA	Adult	0	0	0	0	0	1	0	1
Osphranter_robustus	Unknown	Extant	Macropodidae	Macropus_complex	Hopper	SD	Th_K	40	201	338	107.3	NA	NA	NA	NA	NA	NA	NA	Adult	0	0	0	0	0	1	0	1
Osphranter_rufus	AMNH_200473	Extant	Macropodidae	Macropus_complex	Hopper	SD	CJ	57.9	223.1	486.81	169.08	14.88	18.52	51.72	70.3	NA	NA	NA	Adult	1	1	0	0	1	1	1	1
Osphranter_rufus	NHMUK_205	Extant	Macropodidae	Macropus_complex	Hopper	SD	CJIJ	57.9	253.46	591.16	180.91	NA	NA	45.19	NA	NA	NA	NA	Adult	0	0	0	0	1	1	0	1
Osphranter_rufus	SAM_M2195	Extant	Macropodidae	Macropus_complex	Hopper	SD	CJ	24.7	183	387	137.24	12.56	13.65	37.24	58.56	NA	NA	NA	Adult	1	1	0	0	1	1	1	1
Osphranter_rufus	SAM_M6559	Extant	Macropodidae	Macropus_complex	Hopper	SD	CJ	57.9	213.24	421	142.94	13.66	13.82	40.29	58.83	NA	NA	NA	Adult	1	1	0	0	1	1	1	1
Osphranter_rufus	Unknown	Extant	Macropodidae	Macropus_complex	Hopper	Th	Th_D	72.5	300.5	572.7	179.6	NA	NA	NA	NA	NA	NA	NA	Adult	0	0	0	0	0	1	0	1
Petrogale_assimilis	NHMUK_223	Extant	Macropodidae	Macropodinae	Hopper	ADW	CJIJ	4.5	104.69	147.41	56.02	NA	NA	23.09	NA	NA	NA	NA	Adult	0	0	0	0	1	1	0	1
Petrogale_assimilis	QM_J4470	Extant	Macropodidae	Macropodinae	Hopper	ADW	CJ	4.5	119.13	156.09	55.34	5.15	6.56	23.11	25.09	NA	NA	NA	Adult	1	1	0	0	1	1	1	1
Petrogale_assimilis	NHMUK_223	Extant	Macropodidae	Macropodinae	Hopper	ADW	CJ	4.5	104.18	131.58	50.14	4.99	6.8	22.84	22.3	NA	NA	NA	Adult	1	1	0	0	1	1	1	1
Petrogale_concinna	Unknown	Extant	Macropodidae	Macropodinae	Hopper	ADW	Th_Ja	1.4	72.62	90.03	NA	NA	NA	NA	NA	NA	NA	NA	Adult	0	0	0	0	0	1	0	1
Petrogale_concinna	Unknown	Extant	Macropodidae	Macropodinae	Hopper	ADW	Th_Ja	1.4	82.98	NA	NA	NA	NA	NA	NA	NA	NA	NA	Adult	0	0	0	0	0	1	0	1
Petrogale_godmani	SAM_M7189	Extant	Macropodidae	Macropodinae	Hopper	EC	CJIJ	5.2	107.22	142.42	53.48	NA	NA	22.89	NA	NA	NA	NA	Adult	0	0	0	0	1	1	0	1
Petrogale_godmani	Unknown	Extant	Macropodidae	Macropodinae	Hopper	EC	Th_K	3.2	161.9	206.1	60.9	NA	NA	NA	NA	NA	NA	NA	Adult	0	0	0	0	0	1	0	1
Petrogale_herberti	AMNH_65241	Extant	Macropodidae	Macropodinae	Hopper	Sch	CJ	5.2	125.95	173.7	56.32	5.55	7.96	25.38	31.13	NA	NA	NA	Adult	1	1	0	0	1	1	1	1
Petrogale_lateralis	AM_M24183	Extant	Macropodidae	Macropodinae	Hopper	SD	CJ	4.6	107.43	151.72	49.25	5.11	5.99	20.79	24.84	NA	NA	NA	Adult	1	1	0	0	1	1	1	1
Petrogale_lateralis	Unknown	Extant	Macropodidae	Macropodinae	Hopper	Th	Th_McG	3.5	129.43	167.26	51.56	NA	NA	NA	NA	NA	NA	NA	Adult	0	0	0	0	0	1	0	1
Petrogale_lateralis	Unknown	Extant	Potoroidae	Potoroinae	Hopper	Th	Th_McG	2.59	126.76	160.95	62.94	NA	NA	44.14	NA	NA	NA	NA	Adult	0	0	0	0	1	1	0	1
Petrogale_penicillata	FMNH_64435	Extant	Macropodidae	Macropodinae	Hopper	ADW	RB	7.45	101.23	130.7	47.25	NA	NA	19.7	NA	NA	NA	NA	Adult	0	0	0	0	1	1	0	1
Petrogale_penicillata	Unknown	Extant	Macropodidae	Macropodinae	Hopper	ADW	Th_Ja	7.45	125.95	173.7	56.32	NA	NA	57.54	NA	NA	NA	NA	Adult	0	0	0	0	1	1	0	1
Petrogale_penicillata	Unknown	Extant	Macropodidae	Macropodinae	Hopper	ADW	Th_K	7.45	148.8	187.4	61	NA	NA	NA	NA	NA	NA	NA	Adult	0	0	0	0	0	1	0	1
Petrogale_penicillata	Unknown	Extant	Macropodidae	Macropodinae	Hopper	ADW	Th_K	7.45	141.9	182	59.65	NA	NA	NA	NA	NA	NA	NA	Adult	0	0	0	0	0	1	0	1
Petrogale_penicillata	Unknown	Extant	Macropodidae	Macropodinae	Hopper	ADW	Th_K	7.45	144.5	184.5	59.8	NA	NA	NA	NA	NA	NA	NA	Adult	0	0	0	0	0	1	0	1
Petrogale_penicillata	Unknown	Extant	Macropodidae	Macropodinae	Hopper	ADW	Th_K	7.45	137.8	172.6	56	NA	NA	NA	NA	NA	NA	NA	Adult	0	0	0	0	0	1	0	1
Petrogale_xanthopus	AMNH_35642	Extant	Macropodidae	Macropodinae	Hopper	SD	CJ	6.5	109.2	152.48	57.08	5.35	6.55	24.53	29.75	NA	NA	NA	Adult	1	1	0	0	1	1	1	1
Petrogale_xanthopus	WAM_M11469	Extant	Macropodidae	Macropodinae	Hopper	SD	CJIJ	6.1	151.65	235.44	70.96	NA	NA	28.94	NA	NA	NA	NA	Adult	0	0	0	0	1	1	0	1
Petrogale_xanthopus	Unknown	Extant	Macropodidae	Macropodinae	Hopper	Th	Th_D	8.5	157.7	202.7	69.5	NA	NA	NA	NA	NA	NA	NA	Adult	0	0	0	0	0	1	0	1
Petrogale_xanthopus	Unknown	Extant	Macropodidae	Macropodinae	Hopper	ADW	Th_Ja	5.5	144.74	225.93	69.49	NA	NA	62.49	NA	NA	NA	NA	Adult	0	0	0	0	1	1	0	1
Petrogale_xanthopus	Unknown	Extant	Macropodidae	Macropodinae	Hopper	Th	Th_McG	5.66	135.16	190.76	83.4	NA	NA	48.76	NA	NA	NA	NA	Adult	0	0	0	0	1	1	0	1
Petrogale_xanthopus	Unknown	Extant	Macropodidae	Macropodinae	Hopper	ADW	Th_K	5.5	147.1	203.5	74.6	NA	NA	NA	NA	NA	NA	NA	Adult	0	0	0	0	0	1	0	1
Petrogale_xanthopus	Unknown	Extant	Macropodidae	Macropodinae	Hopper	ADW	Th_K	5.5	159.75	216.75	71.3	NA	NA	NA	NA	NA	NA	NA	Adult	0	0	0	0	0	1	0	1
Petrogale_xanthopus	Unknown	Extant	Macropodidae	Macropodinae	Hopper	ADW	Th_K	5.5	149.55	202.55	65.55	NA	NA	NA	NA	NA	NA	NA	Adult	0	0	0	0	0	1	0	1
Potorous_longipes	NMV_32723	Extant	Potoroidae	Potoroinae	Hopper	SD	CJIJ	1.9	84.23	107.68	42.71	NA	NA	21	NA	NA	NA	NA	Adult	0	0	0	0	1	1	0	1
Potorous_longipes	NMV_C12772	Extant	Potoroidae	Potoroinae	Hopper	SD	CJ	1.9	NA	NA	37.62	4.06	5.66	18.81	NA	NA	NA	NA	Adult	1	0	0	0	0	1	0	1
Potorous_tridactylus	AMNH_65297	Extant	Potoroidae	Potoroinae	Hopper	SD	CJ	1.1	78.1	94.01	31.56	4.2	4.22	16.5	17.71	NA	NA	NA	Adult	1	1	0	0	1	1	1	1
Potorous_tridactylus	FMNH_57805	Extant	Potoroidae	Potoroinae	Hopper	ADW	RB	1.25	63.63	78.44	27.17	NA	NA	12.07	NA	NA	NA	NA	Adult	0	0	0	0	1	1	0	1
Potorous_tridactylus	Unknown	Extant	Potoroidae	Potoroinae	Hopper	Th	Th_D	1.05	75.2	83.4	30.3	NA	NA	NA	NA	NA	NA	NA	Adult	0	0	0	0	0	1	0	1
Potorous_tridactylus	Unknown	Extant	Potoroidae	Potoroinae	Hopper	ADW	Th_Jo	1.25	82	91	NA	NA	NA	NA	NA	NA	NA	NA	Adult	0	0	0	0	0	1	0	1
Potorous_tridactylus	Unknown	Extant	Potoroidae	Potoroinae	Hopper	Th	Th_McG	0.86	76.47	94.39	49	NA	NA	36.08	NA	NA	NA	NA	Adult	0	0	0	0	1	1	0	1
Potorous_tridactylus	Unknown	Extant	Potoroidae	Potoroinae	Hopper	Th	Th_McG	0.79	70.35	84.92	32.73	NA	NA	36.25	NA	NA	NA	NA	Adult	0	0	0	0	1	1	0	1
Potorous_tridactylus	Unknown	Extant	Potoroidae	Potoroinae	Hopper	ADW	Th_K	1.25	79.95	89.35	29.55	NA	NA	NA	NA	NA	NA	NA	Adult	0	0	0	0	0	1	0	1
Potorous_tridactylus	Unknown	Extant	Potoroidae	Potoroinae	Hopper	ADW	Th_K	1.25	66.1	82	31.8	NA	NA	NA	NA	NA	NA	NA	Adult	0	0	0	0	0	1	0	1
Potorous_tridactylus	Unknown	Extant	Potoroidae	Potoroinae	Hopper	ADW	Th_K	1.25	82	90	32	NA	NA	NA	NA	NA	NA	NA	Adult	0	0	0	0	0	1	0	1
Potorous_tridactylus	Unknown	Extant	Potoroidae	Potoroinae	Hopper	ADW	Th_K	1.25	81	93	33	NA	NA	NA	NA	NA	NA	NA	Adult	0	0	0	0	0	1	0	1
Potorous_tridactylus	Unknown	Extant	Potoroidae	Potoroinae	Hopper	ADW	Th_K	1.25	48.4	58.4	25.1	NA	NA	NA	NA	NA	NA	NA	Adult	0	0	0	0	0	1	0	1
Potorous_tridactylus	Unknown	Extant	Potoroidae	Potoroinae	Hopper	ADW	Th_K	1.25	72.2	89	30	NA	NA	NA	NA	NA	NA	NA	Adult	0	0	0	0	0	1	0	1
Procoptodon_browneorum	WAM_65-4-78	Extinct	Sthenurinae	Sthenurinae	Unknown	Sim_P_g	CJ	50	NA	NA	NA	NA	NA	NA	58.84	NA	NA	NA	Adult	0	0	0	0	0	1	0	1
Procoptodon_browneorum	WAM_68-3-637	Extinct	Sthenurinae	Sthenurinae	Unknown	Sim_P_g	CJ	50	NA	NA	135.83	17.63	16.75	38.52	NA	NA	NA	NA	Adult	1	0	0	0	0	1	0	1
Procoptodon_gilli	SAM_composite	Extinct	Sthenurinae	Sthenurinae	Unknown	H	CJ	66	NA	340	NA	NA	NA	NA	NA	NA	NA	NA	Adult	0	0	0	0	0	1	0	1
Procoptodon_gilli	SAM_composite	Extinct	Sthenurinae	Sthenurinae	Unknown	H	CJ	66	NA	340	148	21.3	15.77	NA	NA	NA	NA	NA	Adult	1	0	0	0	0	1	0	1
Procoptodon_goliah	Unknown	Extinct	Sthenurinae	Sthenurinae	Unknown	H	Th_K	232	320	605	208	NA	NA	NA	NA	NA	NA	NA	Adult	0	0	0	0	0	1	0	1
Procoptodon_sp.	NMV_unnumbered	Extinct	Sthenurinae	Sthenurinae	Unknown	H	CJ	232	NA	575	213	37.9	33.69	55.07	93.26	NA	NA	NA	Adult	1	1	0	0	0	1	1	1
Protemnodon_anak	NMV_P39105	Extinct	Macropodidae	Protemnodon	Unknown	Wa	CJ	123	NA	NA	122.89	18.75	22.63	46.85	84.33	NA	NA	NA	Adult	1	1	0	0	0	1	1	1
Protemnodon_anak	NMV_P39101	Extinct	Macropodidae	Protemnodon	Unknown	Wa	CJ	123	318	535	NA	NA	NA	NA	83.52	NA	NA	NA	Adult	0	0	0	0	0	1	0	1
Protemnodon_anak	Unknown	Extinct	Macropodidae	Protemnodon	Unknown	Wa	Th_K	123	358.5	581	127.5	NA	NA	NA	NA	NA	NA	NA	Adult	0	0	0	0	0	1	0	1
Protemnodon_anak	Unknown	Extinct	Macropodidae	Protemnodon	Unknown	Wa	Th_K	123	301.5	435	107	NA	NA	NA	NA	NA	NA	NA	Adult	0	0	0	0	0	1	0	1
Protemnodon_brehus	AMNH_145501	Extinct	Macropodidae	Protemnodon	Unknown	H	CJ	110	271.06	NA	121.24	19.68	22.26	47.36	85.12	NA	NA	NA	Adult	1	1	0	0	0	1	1	1
Protemnodon_snewini	QM_F9075	Extinct	Macropodidae	Protemnodon	Unknown	Sim_M_g	CJ	38	NA	483	103	17.16	20.91	NA	NA	NA	NA	NA	Adult	1	0	0	0	0	1	0	1
Rhizosthenurus_flanneryi	QM_F31456	Extinct	Sthenurinae	Sthenurinae	Unknown	B	CJ	9	NA	NA	90.88	12.38	13.96	33.06	50.97	NA	NA	NA	Adult	1	1	0	0	0	1	1	1
Setonix_brachyurus	NMV_23029	Extant	Macropodidae	Macropodinae	Hopper	SD	CJIJ	3.3	101.42	109.74	40.58	NA	NA	16.91	NA	NA	NA	NA	Adult	0	0	0	0	1	1	0	1
Setonix_brachyurus	NMV_C23029	Extant	Macropodidae	Macropodinae	Hopper	SD	CJ	3.6	104.17	119.7	41.81	5.52	6.09	17.1	24.96	NA	NA	NA	Adult	1	1	0	0	1	1	1	1
Setonix_brachyurus	WAM_M6792	Extant	Macropodidae	Macropodinae	Hopper	SD	CJ	2.9	102.7	118.47	39.42	5.46	6.71	18.07	24.67	NA	NA	NA	Adult	1	1	0	0	1	1	1	1
Setonix_brachyurus	Unknown	Extant	Macropodidae	Macropodinae	Hopper	Th	Th_McG	3	118.24	127.17	39.5	NA	NA	NA	NA	NA	NA	NA	Adult	0	0	0	0	0	1	0	1
Setonix_brachyurus	Unknown	Extant	Macropodidae	Macropodinae	Hopper	Th	Th_McG	2.89	106.53	108.77	46.13	NA	NA	37.45	NA	NA	NA	NA	Adult	0	0	0	0	1	1	0	1
Setonix_brachyurus	Unknown	Extant	Macropodidae	Macropodinae	Hopper	ADW	Th_K	2.9	112.05	122.3	42.05	NA	NA	NA	NA	NA	NA	NA	Adult	0	0	0	0	0	1	0	1
Setonix_brachyurus	Unknown	Extant	Macropodidae	Macropodinae	Hopper	ADW	Th_K	2.9	106.65	113.05	40.3	NA	NA	NA	NA	NA	NA	NA	Adult	0	0	0	0	0	1	0	1
Setonix_brachyurus	Unknown	Extant	Macropodidae	Macropodinae	Hopper	ADW	Th_K	2.9	99.95	109.3	37.8	NA	NA	NA	NA	NA	NA	NA	Adult	0	0	0	0	0	1	0	1
Simosthenurus_occidentalis	SAM_P20820	Extinct	Sthenurinae	Sthenurinae	Unknown	Wa	CJ	112.76	266.01	412	136.47	22.27	22.47	54	68.54	NA	NA	NA	Adult	1	1	0	0	1	1	1	1
Sthenurus_andersoni	SAM_P13673	Extinct	Sthenurinae	Sthenurinae	Unknown	Wa	CJ	58.97	213.23	418	133.18	20.04	14.96	41.24	55.37	NA	NA	NA	Adult	1	1	0	0	1	1	1	1
Sthenurus_andersoni	Unknown	Extinct	Sthenurinae	Sthenurinae	Unknown	Wa	Th_K	58.97	230.5	410.5	130.5	NA	NA	NA	NA	NA	NA	NA	Adult	0	0	0	0	0	1	0	1
Sthenurus_stirlingi	AMNH_117496	Extinct	Sthenurinae	Sthenurinae	Unknown	Wa	CJ	152.05	297.98	535	162.86	29.03	20.79	54.56	75.25	NA	NA	NA	Adult	1	1	0	0	1	1	1	1
Sthenurus_stirlingi	AMNH_117497	Extinct	Sthenurinae	Sthenurinae	Unknown	Wa	CJ	132.84	260.72	502	162.33	24.9	20.63	53.42	75.31	NA	NA	NA	Adult	1	1	0	0	1	1	1	1
Sthenurus_stirlingi	AMNH_140809	Extinct	Sthenurinae	Sthenurinae	Unknown	Wa	CJ	158.52	286.67	552	174.93	29.48	23.8	58.82	81.91	NA	NA	NA	Adult	1	1	0	0	1	1	1	1
Sthenurus_stirlingi	NMV_P150278	Extinct	Sthenurinae	Sthenurinae	Unknown	CJ	CJ	133	260	500	160.4	22.9	20.35	53.59	72.22	NA	NA	NA	Adult	1	1	0	0	1	1	1	1
Sthenurus_stirlingi	AMNH_117494A	Extinct	Sthenurinae	Sthenurinae	Unknown	CJ	CJ	164	NA	NA	183.72	31.8	22.03	61.04	86.42	NA	NA	NA	Adult	1	1	1	0	0	1	1	1
Sthenurus_stirlingi	Unknown	Extinct	Sthenurinae	Sthenurinae	Unknown	Av_Oth	Th_K	148.082	347	590	179.3	NA	NA	NA	NA	NA	NA	NA	Adult	0	0	0	0	0	1	0	1
Sthenurus_stirlingi	Unknown	Extinct	Sthenurinae	Sthenurinae	Unknown	Av_Oth	Th_K	148.082	296.5	521	167	NA	NA	NA	NA	NA	NA	NA	Adult	0	0	0	0	0	1	0	1
Sthenurus_stirlingi	Unknown	Extinct	Sthenurinae	Sthenurinae	Unknown	Av_Oth	Th_K	148.082	296	517	165	NA	NA	NA	NA	NA	NA	NA	Adult	0	0	0	0	0	1	0	1
Sthenurus_stirlingi	Unknown	Extinct	Sthenurinae	Sthenurinae	Unknown	Av_Oth	Th_K	148.082	325	550	170.8	NA	NA	NA	NA	NA	NA	NA	Adult	0	0	0	0	0	1	0	1
Sthenurus_tindalei	AMNH_117493	Extinct	Sthenurinae	Sthenurinae	Unknown	H	CJ	127	293.44	500.1	154.93	24.55	20.46	51.97	79.91	NA	NA	NA	Adult	1	1	0	0	1	1	1	1
Sthenurus_tindalei	AMNH_117499	Extinct	Sthenurinae	Sthenurinae	Unknown	H	CJ	127	281	494	154.93	24.55	20.46	51.97	NA	NA	NA	NA	Adult	1	0	0	0	1	1	0	1
Sthenurus_tindalei	Unknown	Extinct	Sthenurinae	Sthenurinae	Unknown	H	Th_K	127	319	494	168.1	NA	NA	NA	NA	NA	NA	NA	Adult	0	0	0	0	0	1	0	1
Thylogale_billardierii	NHMUK_49.6.20.3	Extant	Macropodidae	Macropodinae	Hopper	RR	CJIJ	7.4	138.21	163.49	57.98	NA	NA	21.09	NA	NA	NA	NA	Adult	0	0	0	0	1	1	0	1
Thylogale_billardierii	NHMUK_49.6.20.3	Extant	Macropodidae	Macropodinae	Hopper	RR	CJ	7.4	135.11	167.51	57.41	7.53	8.58	23.93	28.67	NA	NA	NA	Adult	1	1	0	0	1	1	1	1
Thylogale_billardierii	Unknown	Extant	Macropodidae	Macropodinae	Hopper	Th	Th_D	5.87	134.7	165.1	52.1	NA	NA	NA	NA	NA	NA	NA	Adult	0	0	0	0	0	1	0	1
Thylogale_billardierii	Unknown	Extant	Macropodidae	Macropodinae	Hopper	RR	Th_Ja	7.4	134.74	174.93	NA	NA	NA	NA	NA	NA	NA	NA	Adult	0	0	0	0	0	1	0	1
Thylogale_billardierii	Unknown	Extant	Macropodidae	Macropodinae	Hopper	RR	Th_Ja	7.4	160.5	144	NA	NA	NA	NA	NA	NA	NA	NA	Adult	0	0	0	0	0	1	0	1
Thylogale_billardierii	Unknown	Extant	Macropodidae	Macropodinae	Hopper	RR	Th_K	7.4	132.1	156.1	NA	NA	NA	NA	NA	NA	NA	NA	Adult	0	0	0	0	0	1	0	1
Thylogale_billardierii	Unknown	Extant	Macropodidae	Macropodinae	Hopper	RR	Th_K	7.4	154.1	185.85	57.1	NA	NA	NA	NA	NA	NA	NA	Adult	0	0	0	0	0	1	0	1
Thylogale_billardierii	Unknown	Extant	Macropodidae	Macropodinae	Hopper	RR	Th_K	7.4	154.45	182.5	NA	NA	NA	NA	NA	NA	NA	NA	Adult	0	0	0	0	0	1	0	1
Thylogale_billardierii	Unknown	Extant	Macropodidae	Macropodinae	Hopper	RR	Th_K	7.4	126.25	151.5	54.65	NA	NA	NA	NA	NA	NA	NA	Adult	0	0	0	0	0	1	0	1
Thylogale_billardierii	Unknown	Extant	Macropodidae	Macropodinae	Hopper	RR	Th_K	7.4	133.7	164.55	NA	NA	NA	NA	NA	NA	NA	NA	Adult	0	0	0	0	0	1	0	1
Thylogale_stigmatica	AMNH_65153	Extant	Macropodidae	Macropodinae	Hopper	SD	CJ	5.1	132	184.4	55.41	5.69	6.61	20.11	23.32	NA	NA	NA	Adult	1	1	0	0	1	1	1	1
Thylogale_stigmatica	UMZC_a12._44/1	Extant	Macropodidae	Macropodinae	Hopper	ADW	RB	4.65	122.87	176.14	62.32	NA	NA	18.6	NA	NA	NA	NA	Adult	0	0	0	0	1	1	0	1
Thylogale_thetis	AM_M51512	Extant	Macropodidae	Macropodinae	Hopper	SD	CJ	4.7	105.93	135.93	52.45	5.22	6.06	18.47	24.71	NA	NA	NA	Adult	1	1	0	0	1	1	1	1
Thylogale_thetis	Unknown	Extant	Macropodidae	Macropodinae	Hopper	SD	Th_K	4.7	117.3	139.6	52.9	NA	NA	NA	NA	NA	NA	NA	Adult	0	0	0	0	0	1	0	1
Thylogale_thetis	Unknown	Extant	Macropodidae	Macropodinae	Hopper	SD	Th_K	4.7	136	178	53.2	NA	NA	NA	NA	NA	NA	NA	Adult	0	0	0	0	0	1	0	1
Wallabia_bicolor	AMNH_65722	Extant	Macropodidae	Macropodinae	Hopper	SD	CJ	12	168.16	243.1	84.38	8.32	9.55	32.06	40.73	NA	NA	NA	Adult	1	1	0	0	1	1	1	1
Wallabia_bicolor	SAM_M11364	Extant	Macropodidae	Macropodinae	Hopper	SD	CJIJ	17	212.01	312.21	95.77	NA	NA	38.06	NA	NA	NA	NA	Adult	0	0	0	0	1	1	0	1
Wallabia_bicolor	SAM_M11364	Extant	Macropodidae	Macropodinae	Hopper	SD	CJ	17	200.41	300	95.61	12.06	11.88	39.16	50.24	NA	NA	NA	Adult	1	1	0	0	1	1	1	1
Wallabia_bicolor	Unknown	Extant	Macropodidae	Macropodinae	Hopper	Th	Th_McG	17.92	NA	NA	89.94	NA	NA	NA	NA	NA	NA	NA	Adult	0	0	0	0	0	1	0	1
Wallabia_bicolor	Unknown	Extant	Macropodidae	Macropodinae	Hopper	SD	Th_K	17	178.05	252.15	80.85	NA	NA	NA	NA	NA	NA	NA	Adult	0	0	0	0	0	1	0	1
Wallabia_bicolor	Unknown	Extant	Macropodidae	Macropodinae	Hopper	SD	Th_K	17	182.7	252.1	82.45	NA	NA	NA	NA	NA	NA	NA	Adult	0	0	0	0	0	1	0	1
Wallabia_bicolor	Unknown	Extant	Macropodidae	Macropodinae	Hopper	SD	Th_K	17	169.6	249.2	86.85	NA	NA	NA	NA	NA	NA	NA	Adult	0	0	0	0	0	1	0	1
Wallabia_bicolor	Unknown	Extant	Macropodidae	Macropodinae	Hopper	SD	Th_K	17	189.95	259.1	79.9	NA	NA	NA	NA	NA	NA	NA	Adult	0	0	0	0	0	1	0	1
Wallabia_bicolor	Unknown	Extant	Macropodidae	Macropodinae	Hopper	SD	Th_K	17	164	237.2	77.5	NA	NA	NA	NA	NA	NA	NA	Adult	0	0	0	0	0	1	0	1
Wallabia_bicolor	Unknown	Extant	Macropodidae	Macropodinae	Hopper	SD	Th_K	17	190.5	261	90	NA	NA	NA	NA	NA	NA	NA	Adult	0	0	0	0	0	1	0	1
Wallabia_bicolor	Unknown	Extant	Macropodidae	Macropodinae	Hopper	SD	Th_K	17	189.5	256	81.4	NA	NA	NA	NA	NA	NA	NA	Adult	0	0	0	0	0	1	0	1
Wallabia_bicolor	Unknown	Extant	Macropodidae	Macropodinae	Hopper	SD	Th_K	17	200	277	86	NA	NA	NA	NA	NA	NA	NA	Adult	0	0	0	0	0	1	0	1
Dendrolagus_bennettianus	NMV_C7125	Extant	Macropodidae	Tree_kangaroo	Arboreal	WM	NMV_MJ	10.45	NA	NA	46.32	NA	NA	NA	30.27	12.42	9.61	10.17	Adult	0	0	1	1	0	0	0	0
Dendrolagus_bennettianus	SAM_M5530	Extant	Macropodidae	Tree_kangaroo	Arboreal	SD	MJIJ	13	NA	NA	52.5	NA	NA	NA	36.54	14.86	NA	NA	Adult	0	0	1	0	0	0	0	0
Dendrolagus_goodfellowi	NMV_C25092	Extant	Macropodidae	Tree_kangaroo	Arboreal	WM	NMV_MJ	7.6	NA	NA	36.19	NA	NA	NA	24.52	13.15	8.39	9.05	Adult	0	0	1	1	0	0	0	0
Dendrolagus_lumholtzi	NMV_C7127	Extant	Macropodidae	Tree_kangaroo	Arboreal	WM	NMV_MJ	7.65	NA	NA	40.73	NA	NA	NA	27.31	11.34	9.09	9.52	Adult	0	0	1	1	0	0	0	0
Dendrolagus_matschiei	NMV_C5582	Extant	Macropodidae	Tree_kangaroo	Arboreal	WM	NMV_MJ	8.5	NA	NA	35.76	NA	NA	NA	23.95	13.19	8.67	9.33	Adult	0	0	1	1	0	0	0	0
Dorcopsis_luctuosa	NMV_C31253	Extant	Macropodidae	Macropodinae	Generalist_hopper	WM	NMV_MJ	9.15	NA	NA	47.69	NA	NA	NA	27.42	12.35	7.46	12.12	Adult	0	0	1	1	0	0	0	0
Dorcopsis_sp	NMV_C31632	Extant	Macropodidae	Macropodinae	Generalist_hopper	NMV_lab	NMV_MJ	4.128	NA	NA	44.38	NA	NA	NA	24.04	11.53	6.74	9.33	Adult	0	0	1	1	0	0	0	0
Macropus_fuliginosus	NMV_C11377	Extant	Macropodidae	Macropus_complex	Pentapedal_hopper	WM	NMV_MJ	36.5	NA	NA	148.83	NA	NA	NA	50.55	14.43	NA	NA	Adult	0	0	1	0	0	0	0	0
Macropus_fuliginosus	NMV_C23512	Extant	Macropodidae	Macropus_complex	Pentapedal_hopper	WM	NMV_MJ	36.5	NA	NA	160.84	NA	NA	NA	70.83	20.95	9.96	21.81	Adult	0	0	1	1	0	0	0	0
Macropus_fuliginosus	SAM_M2219	Extant	Macropodidae	Macropus_complex	Pentapedal_hopper	SD	MJIJ	54	NA	NA	155.71	NA	NA	NA	73.81	21.98	NA	NA	Adult	0	0	1	0	0	0	0	0
Macropus_giganteus	NMV_C31690	Extant	Macropodidae	Macropus_complex	Pentapedal_hopper	NMV_lab	NMV_MJ	21.04	NA	NA	126.21	NA	NA	NA	56.44	17.11	NA	NA	Adult	0	0	1	0	0	0	0	0
Macropus_giganteus	NMV_C6465	Extant	Macropodidae	Macropus_complex	Pentapedal_hopper	WM	NMV_MJ	54.5	NA	NA	170	NA	NA	NA	77.45	24.07	13.06	25.14	Adult	0	0	1	1	0	0	0	0
Macropus_giganteus	NMV_P39127	Extinct	Macropodidae	Macropus_complex	Unknown	H	NMV_MJ	102.333	NA	NA	171.95	NA	NA	NA	90.92	32.34	21.26	30.53	Adult	0	0	1	1	0	0	0	0
Macropus_titan	NHMUK-PVM10702a	Extinct	Macropodidae	Macropus_complex	Unknown	Wa	WaIJ	176	NA	NA	213.78	NA	NA	NA	109.73	52.91	NA	NA	Adult	0	0	1	0	0	0	0	0
Notamacropus_agilis	NMV_C31562U	Extant	Macropodidae	Macropus_complex	Pentapedal_hopper	WM	NMV_MJ	16.75	NA	NA	96.01	NA	NA	NA	43.67	13.77	7.32	13.46	Adult	0	0	1	1	0	0	0	0
Notamacropus_eugenii	NMV_C7305	Extant	Macropodidae	Macropus_complex	Generalist_hopper	WM	NMV_MJ	4.57	NA	NA	57.44	NA	NA	NA	26.38	9.05	5.39	8.72	Adult	0	0	1	1	0	0	0	0
Notamacropus_parryi	NMV_C6605	Extant	Macropodidae	Macropus_complex	Pentapedal_hopper	SD	NMV_MJ	11	NA	NA	127.33	NA	NA	NA	57.36	17.39	8.98	18.05	Adult	0	0	1	1	0	0	0	0
Notamacropus_rufogriseus	NMV_C22286	Extant	Macropodidae	Macropus_complex	Pentapedal_hopper	NMV_lab	NMV_MJ	7.03	NA	NA	93.27	NA	NA	NA	36.77	11.72	NA	NA	Adult	0	0	1	0	0	0	0	0
Notamacropus_rufogriseus	NMV_C6428	Extant	Macropodidae	Macropus_complex	Pentapedal_hopper	WM	NMV_MJ	16.8125	NA	NA	92.3	NA	NA	NA	43.2	14.77	9.09	14.54	Adult	0	0	1	1	0	0	0	0
Osphranter_rufus	NMV_C30597	Extant	Macropodidae	Macropus_complex	Pentapedal_hopper	WM	NMV_MJ	28	NA	NA	133.15	NA	NA	NA	51.35	15.53	NA	NA	Adult	0	0	1	0	0	0	0	0
Osphranter_rufus	NMV_C6590	Extant	Macropodidae	Macropus_complex	Pentapedal_hopper	WM	NMV_MJ	57	NA	NA	175.51	NA	NA	NA	81.22	24.86	13.26	26.73	Adult	0	0	1	1	0	0	0	0
Osphranter_rufus	SAM_M16381	Extant	Macropodidae	Macropus_complex	Pentapedal_hopper	SD	MJIJ	24.7	NA	NA	189.91	NA	NA	NA	76.37	20.15	NA	NA	Adult	0	0	1	0	0	0	0	0
Petrogale_godmani	NMV_C26530	Extant	Macropodidae	Macropodinae	Generalist_hopper	NMV_lab	NMV_MJ	13	NA	NA	60.17	NA	NA	NA	29.55	10.85	6.35	9.61	Adult	0	0	1	1	0	0	0	0
Petrogale_penicillata	NMV_C18504	Extant	Macropodidae	Macropodinae	Generalist_hopper	NMV_lab	NMV_MJ	5.5	NA	NA	58.01	NA	NA	NA	29.77	9.26	5.7	10.13	Adult	0	0	1	1	0	0	0	0
Petrogale_penicillata	NMV_C26678	Extant	Macropodidae	Macropodinae	Generalist_hopper	WM	NMV_MJ	6.925	NA	NA	59.78	NA	NA	NA	33.36	12.38	7.33	11.52	Adult	0	0	1	1	0	0	0	0
Petrogale_xanthopus	NMV_C10197	Extant	Macropodidae	Macropodinae	Generalist_hopper	WM	NMV_MJ	8.75	NA	NA	73.62	NA	NA	NA	34.37	10.84	NA	NA	Adult	0	0	1	0	0	0	0	0
Petrogale_xanthopus	NMV_C9486	Extant	Macropodidae	Macropodinae	Generalist_hopper	NMV_lab	NMV_MJ	13	NA	NA	70.29	NA	NA	NA	36.55	11.59	6.33	10.55	Adult	0	0	1	1	0	0	0	0
Procoptodon_goliah	NMV_P28861	Extinct	Macropodidae	Sthenurinae	Unknown	H	NMV_MJ	232	NA	NA	207.29	NA	NA	NA	100.65	41.42	27.58	32.93	Adult	0	0	1	1	0	0	0	0
Protemnodon_anak	NMV_P159917	Extinct	Macropodidae	Protemnodon	Unknown	H	NMV_MJ	131	NA	NA	123.91	NA	NA	NA	90.81	34.8	20.53	34.75	Adult	0	0	1	1	0	0	0	0
Protemnodon_anak	NMV_P39132	Extinct	Macropodidae	Protemnodon	Unknown	H	NMV_MJ	131	NA	NA	118.24	NA	NA	NA	78.81	33.66	18.55	30.88	Adult	0	0	1	1	0	0	0	0
Protemnodon_roechus	SAM_P13027	Extinct	Macropodidae	Protemnodon	Generalist_hopper	H	MJIJ	166	NA	NA	NA	NA	NA	NA	125.1	40.04	NA	NA	Adult	0	0	1	0	0	0	0	0
Protemnodon_anak	NMV_P201755	Extinct	Macropodidae	Protemnodon	Unknown	H	NMV_MJ	131	NA	NA	NA	NA	NA	NA	83.61	29.43	26.18	31.3	Adult	0	0	1	1	0	0	0	0
Protemnodon_anak	NMV_P209937	Extinct	Macropodidae	Protemnodon	Unknown	H	NMV_MJ	131	NA	NA	115.64	NA	NA	NA	81.16	35.53	20.63	32.06	Adult	0	0	1	1	0	0	0	0
Protemnodon_anak	NMV_P209937_1	Extinct	Macropodidae	Protemnodon	Unknown	H	NMV_MJ	131	NA	NA	104.06	NA	NA	NA	68.21	30.95	17.99	28.85	Adult	0	0	1	1	0	0	0	0
Protemnodon_anak	NMV_P26548	Extinct	Macropodidae	Protemnodon	Unknown	H	NMV_MJ	131	NA	NA	NA	NA	NA	NA	102.48	44.03	26.98	33.6	Adult	0	0	1	1	0	0	0	0
Protemnodon_anak	NMV_P39101	Extinct	Macropodidae	Protemnodon	Unknown	H	NMV_MJ	131	NA	NA	123.72	NA	NA	NA	88.98	35.38	22.76	33.64	Adult	0	0	1	1	0	0	0	0
Protemnodon_anak	NMV_P39105	Extinct	Macropodidae	Protemnodon	Unknown	H	NMV_MJ	131	NA	NA	122.03	NA	NA	NA	85.96	34.71	20.34	33	Adult	0	0	1	1	0	0	0	0
Setonix_brachyurus	NMV_C23029	Extant	Macropodidae	Macropodinae	Generalist_hopper	WM	NMV_MJ	3	NA	NA	41.04	NA	NA	NA	25.08	8.6	5.95	7.56	Adult	0	0	1	1	0	0	0	0
Simosthenurus_occidentalis	SAM_P20820	Extinct	Sthenurinae	Sthenurinae	Unknown	Wa	NMV_MJ	112.76	NA	NA	136.47	NA	NA	NA	84.72	34.85	NA	NA	Adult	0	0	1	0	0	0	0	0
Sthenurus_stirlingi	NMV_P150277.2_ NMV_P15028.1	Extinct	Sthenurinae	Sthenurinae	Unknown	CJ	NMV_MJ	133	NA	NA	160.3	NA	NA	NA	81.12	36.31	18.7	30.38	Adult	0	0	1	1	0	0	0	0
Sthenurus_stirlingi	SAM_P22533	Extinct	Sthenurinae	Sthenurinae	Unknown	Av_Oth	MJIJ	148	NA	NA	162.83	NA	NA	NA	108.72	42.93	NA	NA	Adult	0	0	1	0	0	0	0	0
Thylogale_billardierii	NMV_C6028	Extant	Macropodidae	Macropodinae	Generalist_hopper	WM	NMV_MJ	6.2	NA	NA	51.14	NA	NA	NA	24.5	9.93	4.7	8.57	Adult	0	0	1	1	0	0	0	0
Wallabia_bicolor	NMV_C23514	Extant	Macropodidae	Macropodinae	Pentapedal_hopper	WM	NMV_MJ	14.625	NA	NA	92.6433	NA	NA	NA	47.8133	17.2433	9.21	15.4633	Adult	0	0	1	1	0	0	0	0

## Sheet: Abbreviations key
Key
Mass/length sources
ADW	Animal Diversity Web (https://animaldiversity.org/)
Av_Oth	Average (mean) of other estimates for the same species in the dataset
B	Butler et al. (2017)
CJ	Christine Janis, personal communication
CJIJ	Photograph with scale provided by Christine Janis through personal correspondence, measurements taken in ImageJ 1.53K
D	Dawson (2006)
EC	Dawson (1995)
GB	Green-Barber et al. (2018)
H	Helgen et al. (2006)
MJIJ	Photograph with scale taken by Megan Jones, measurements taken in ImageJ 1.53K
NMV_lab	Mass marked on the specimen label, NMV
NMV_MJ	NMV specimens measured with callipers by Megan Jones
RB	CT scans provided by Roger Benson, via the project TEMPO Mammals (Project ID 00000C428) on MorphoSource.org (Duke university). Funding for this collection was provided by the European Research Council (ERC) starting grant TEMPO (ERC-2015-STG-677774). The CT scans were segmented and measurements taken in Avizo
RR	Rose and Rose (2018)
Th	Thornton et al. (2021)
Th_B	Thornton et al. (2021), referencing Bauschulte (1972)
Th_McG	Thornton et al. (2021), referencing McGowan et al. (2008)
Th_K	Thornton et al. (2021), referencing Kear (2008)
Th_D	Thornton et al. (2021), referencing Doube (2018)
Th_Jo	Thornton et al. (2021), referencing Johnson (1982)
Th_Ja	Thornton et al. (2021), referencing Janis et al. (2014)
Sch	Schulz (1997)
SD	Silva and Downing (1995)
Sim_M_g	Similar size to M. giganteus
Sim_P_g	Similar size to P. gilli
Wa	Wagstaffe et al. (2022)
WaIJ	Photograph with scale taken from Wagstaffe et al. (2022), measurements taken in ImageJ 1.53K
WM	Wilson and Mittermeier (2015)
Institution codes
AM	Australian Museum (Sydney, NSW, Australia)
AMNH	American Museum of Natural History (New York, USA)
FMNH	Field Museum of Natural History (Chicago, IL, USA)
NHMUK	Natural History Museum (London, UK)
NMV	Museums Victoria (Melbourne, VIC, Australia)
NTM	Northern Territories Museum and Art Gallery (Alice Springs, NT, Australia)
QM	Queensland Museum (Brisbane, QLD, Australia)
SAM	South Australian Museum (Adelaide, SA, Australia)
UCMP	University of California Museum of Palaeontology (Berkeley, CA, USA)
UMZC	University of Cambridge Museum of Zoology (Cambridge, UK)
WAM	Western Australian Museum (Perth, WA, Australia)
